# Supplementary material
Source: MDPI journal article supplement (https://www.mdpi.com/2227-7080/9/3/55)
Supplement: s1 [file s1]

**Supplementary file. Bland-Altman plots for steps**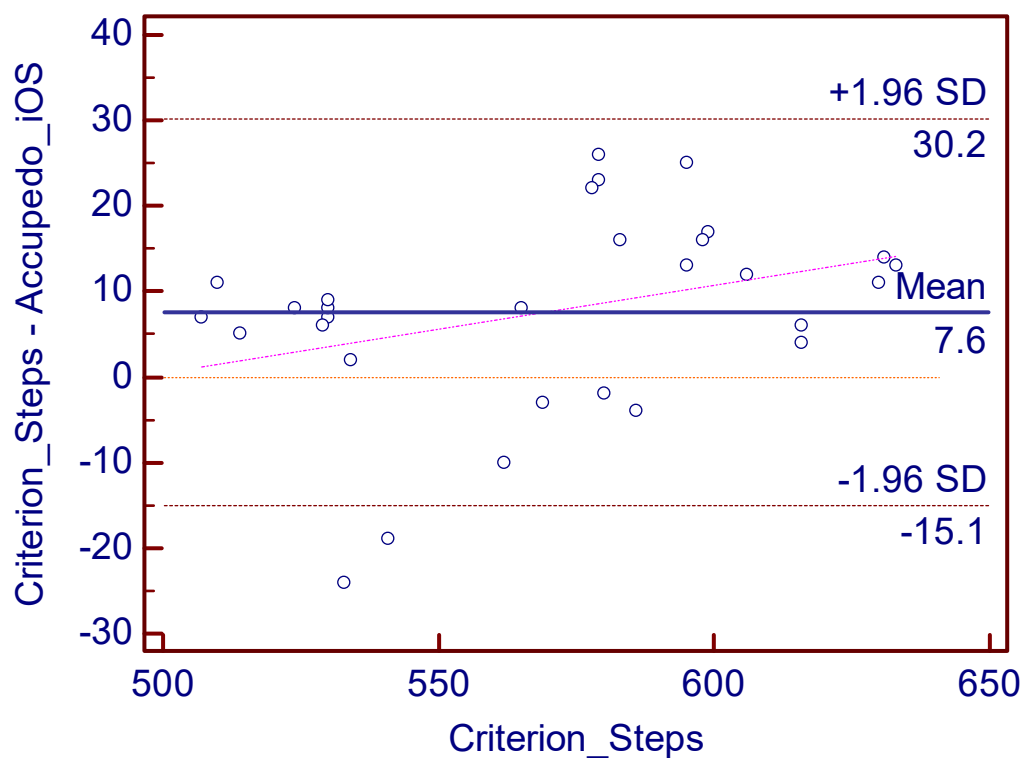

**Figure S1.** Bland-Altman plot for *Accupedo iOS* step estimates during walking at 4.8 km/h compared with criterion measure.

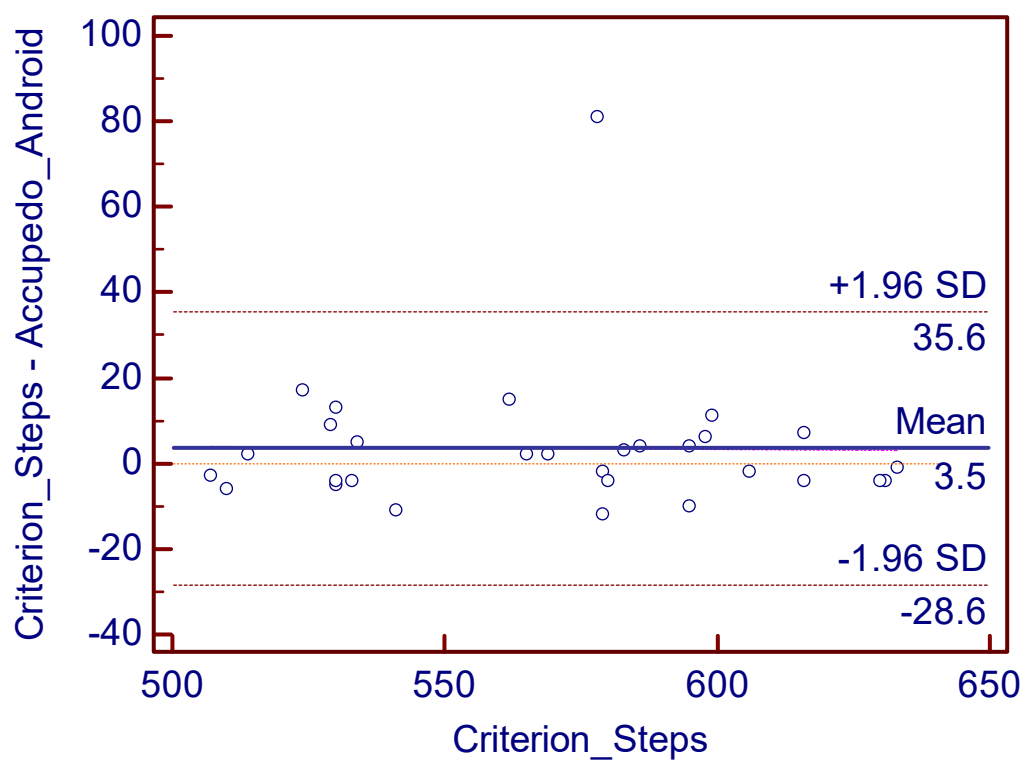

**Figure S2.** Bland-Altman plot for *Accupedo Android* step estimates during walking at 4.8 km/h compared with criterion measure.

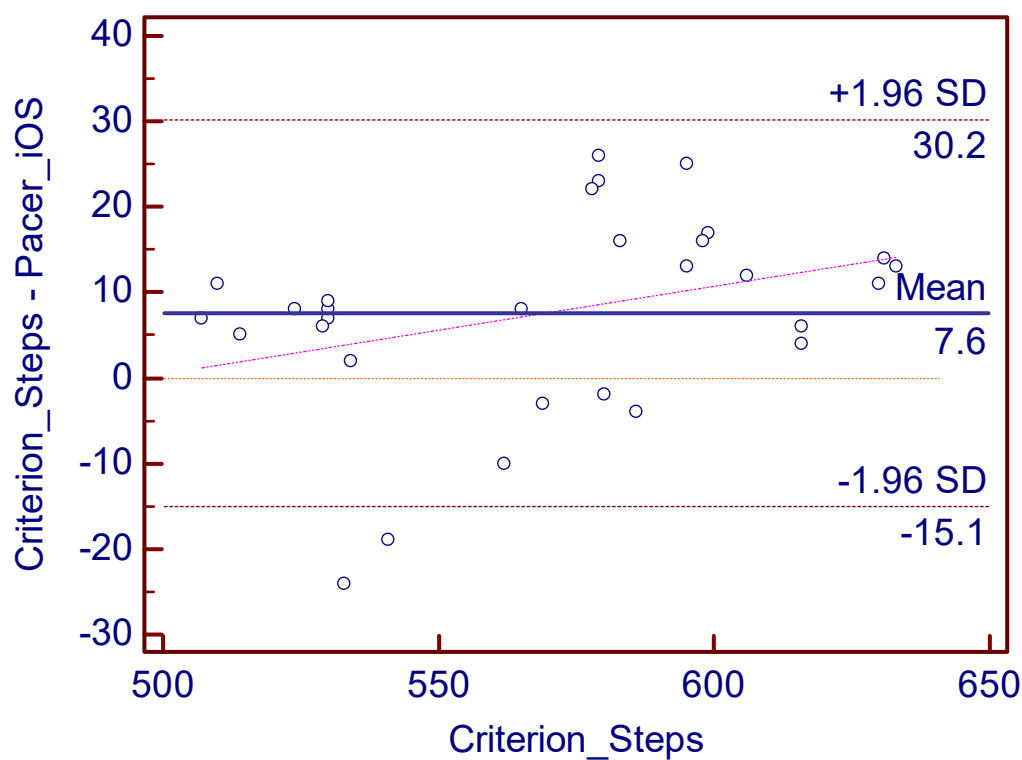

**Figure S3.** Bland-Altman plot for *Pacer iOS* step estimates during walking at 4.8 km/h compared with criterion measure.

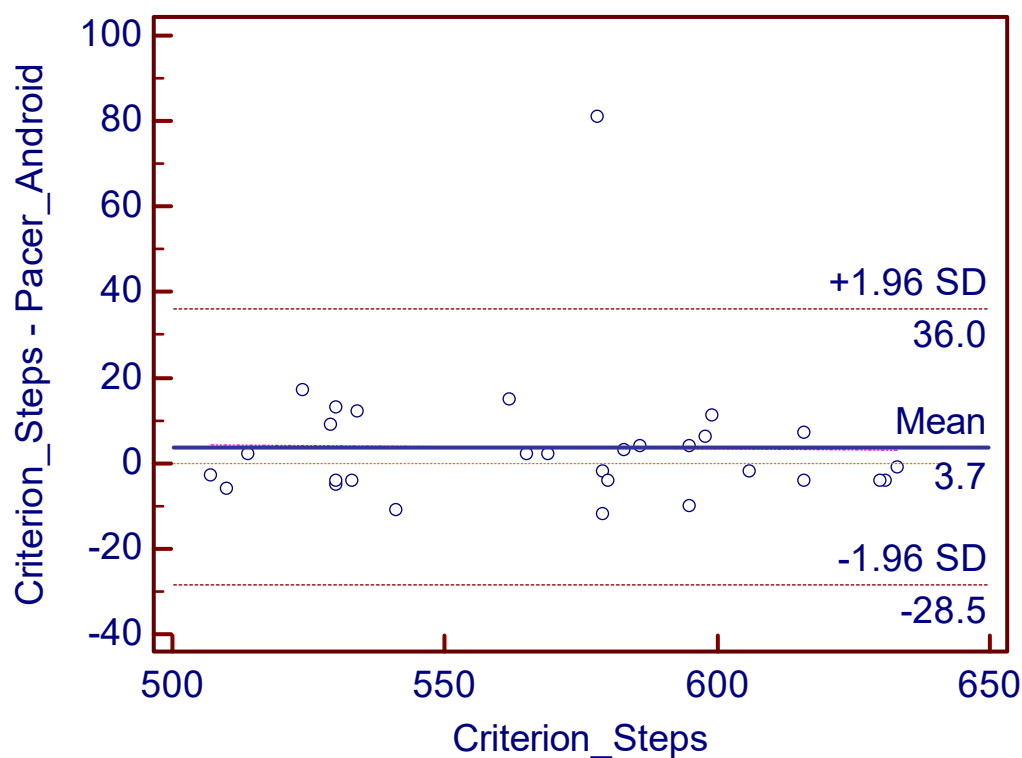

**Figure S4.** Bland-Altman plot for *Pacer Android* step estimates during walking at 4.8 km/h compared with criterion measure.

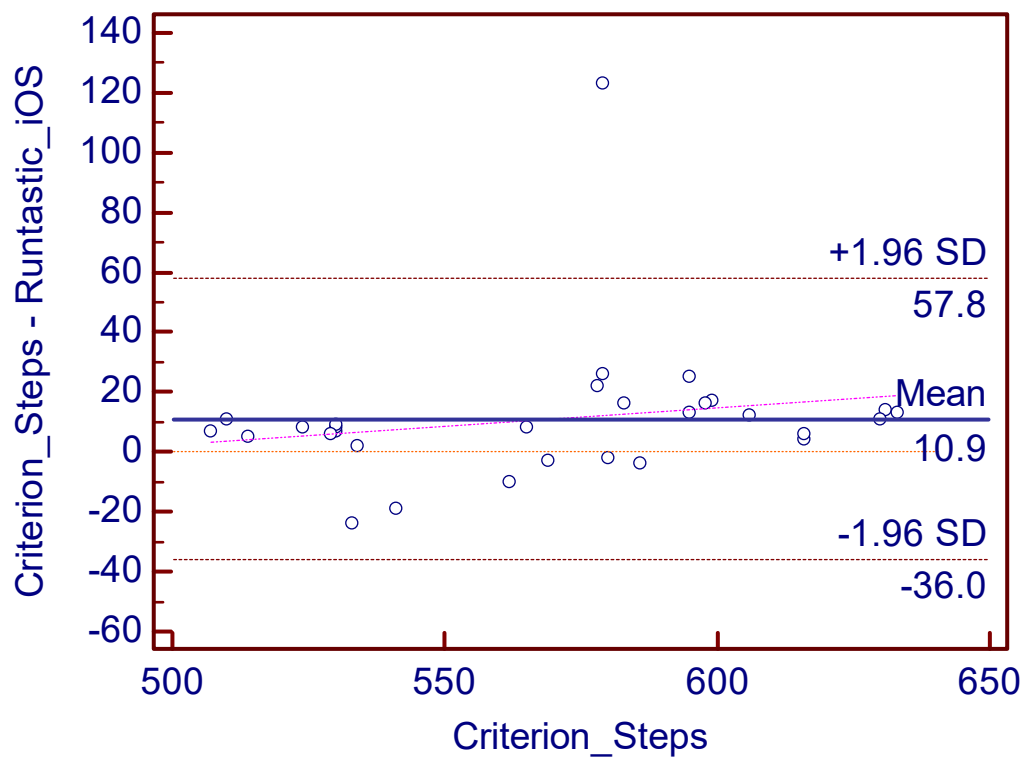

**Figure S5.** Bland-Altman plot for *Runtastic iOS* step estimates during walking at 4.8 km/h compared with criterion measure.

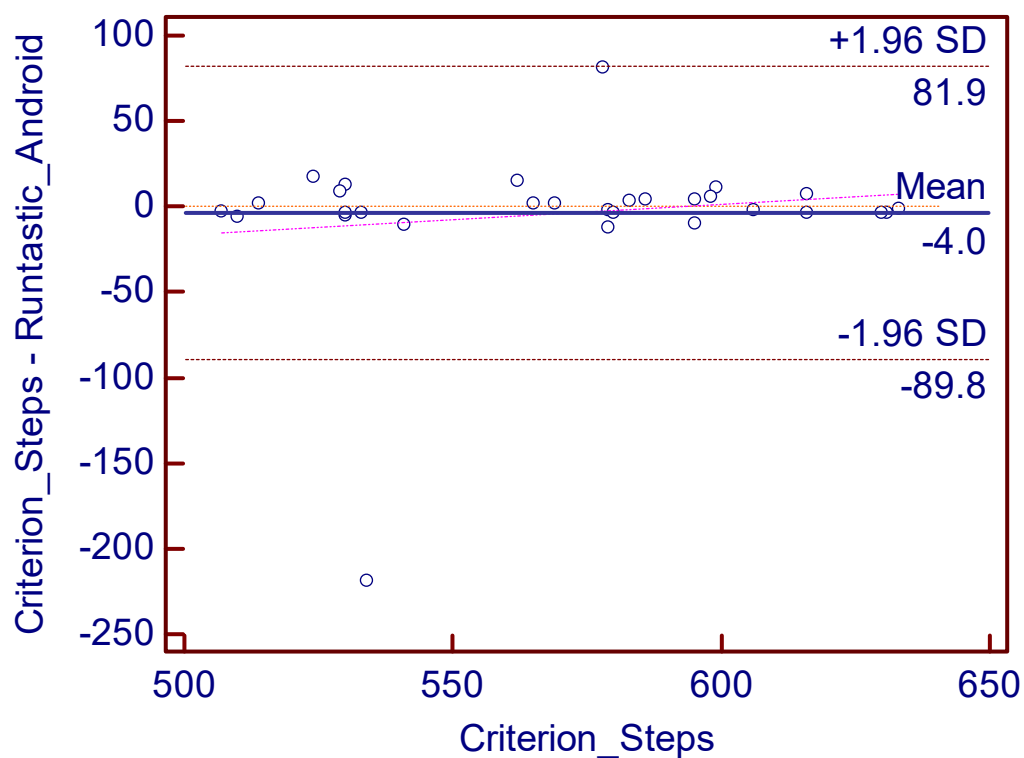

**Figure S6.** Bland-Altman plot for *Runtastic Android* step estimates during walking at 4.8 km/h compared with criterion measure.

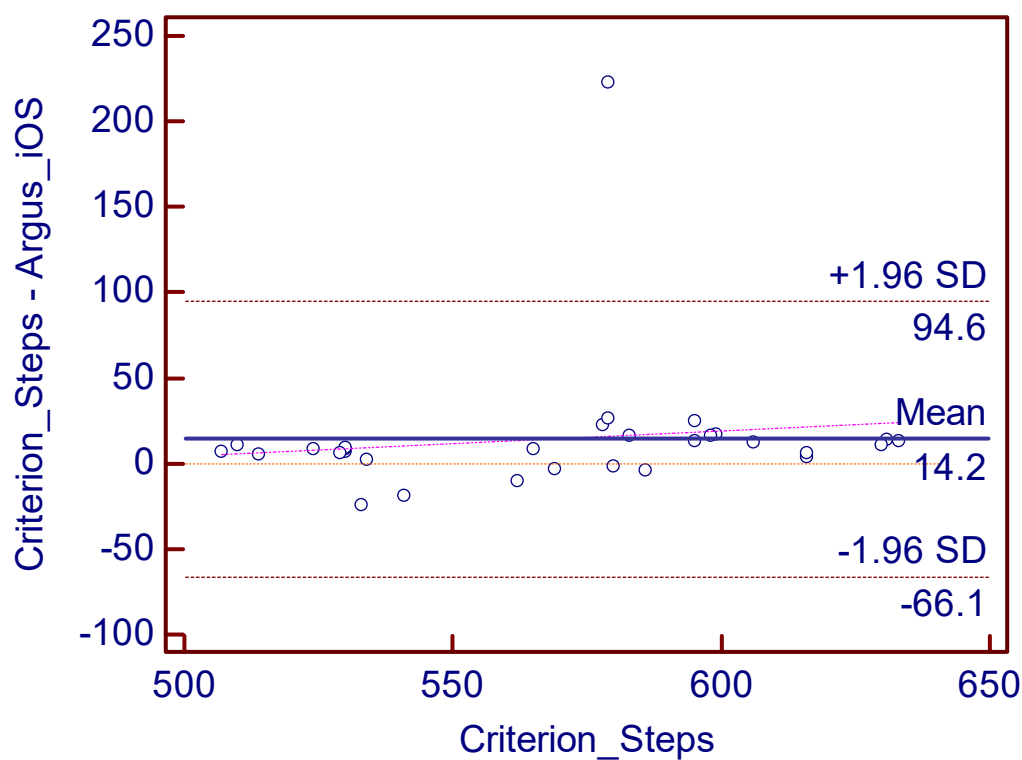

**Figure S7.** Bland-Altman plot for *Argus iOS* step estimates during walking at 4.8 km/h compared with criterion measure.

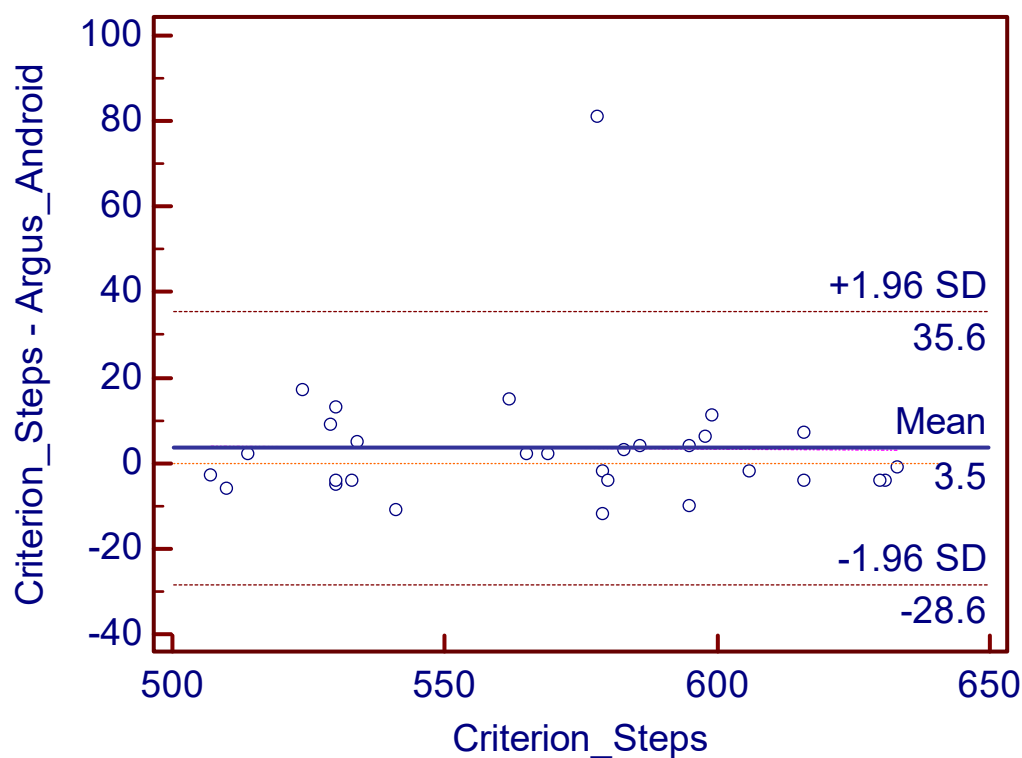

**Figure S8.** Bland-Altman plot for *Argus Android* step estimates during walking at 4.8 km/h compared with criterion measure.

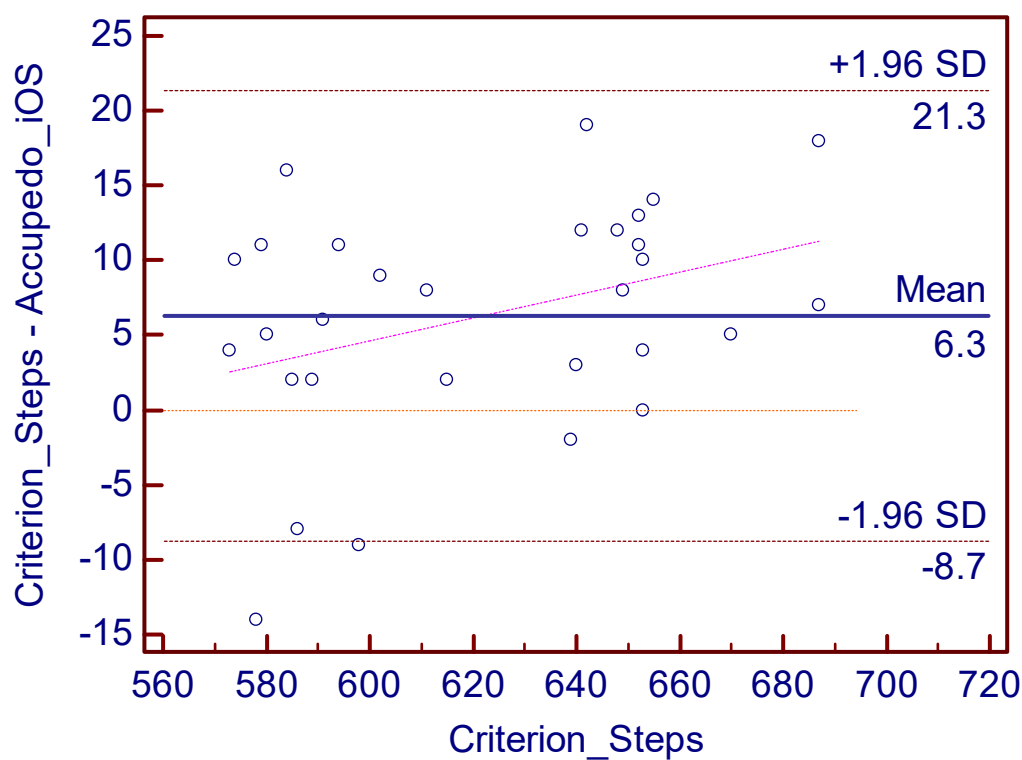

**Figure S9.** Bland-Altman plot for *Accupedo iOS* step estimates during walking at 6.0 km/h compared with criterion measure.

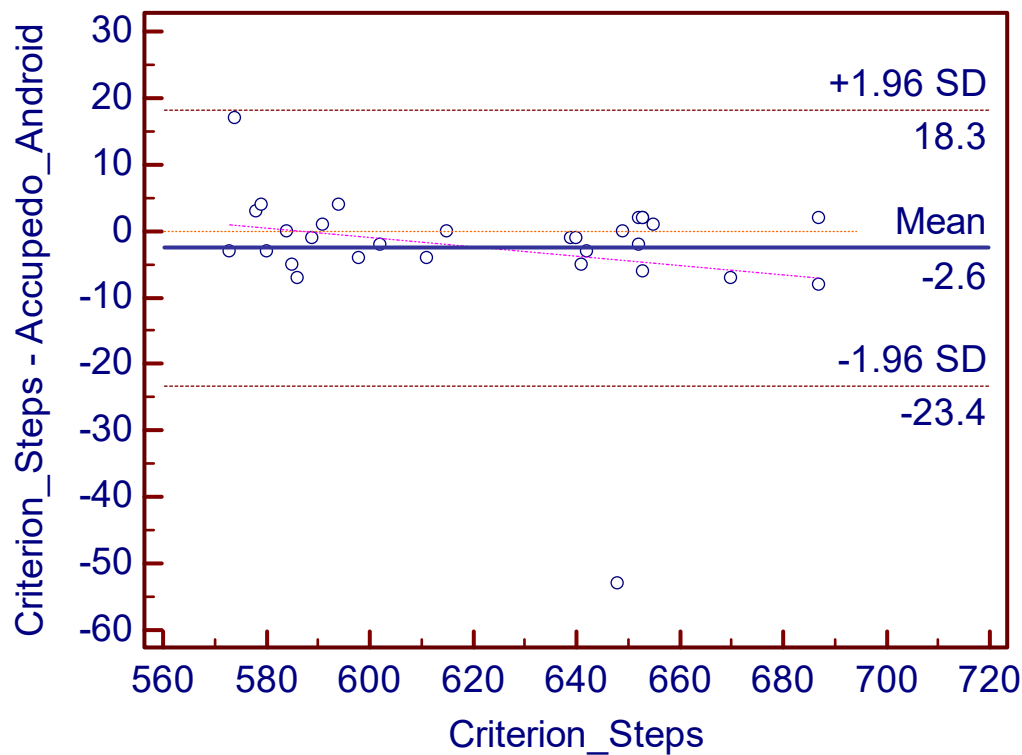

**Figure S10.** Bland-Altman plot for *Accupedo Android* step estimates during walking at 6.0 km/h compared with criterion measure.

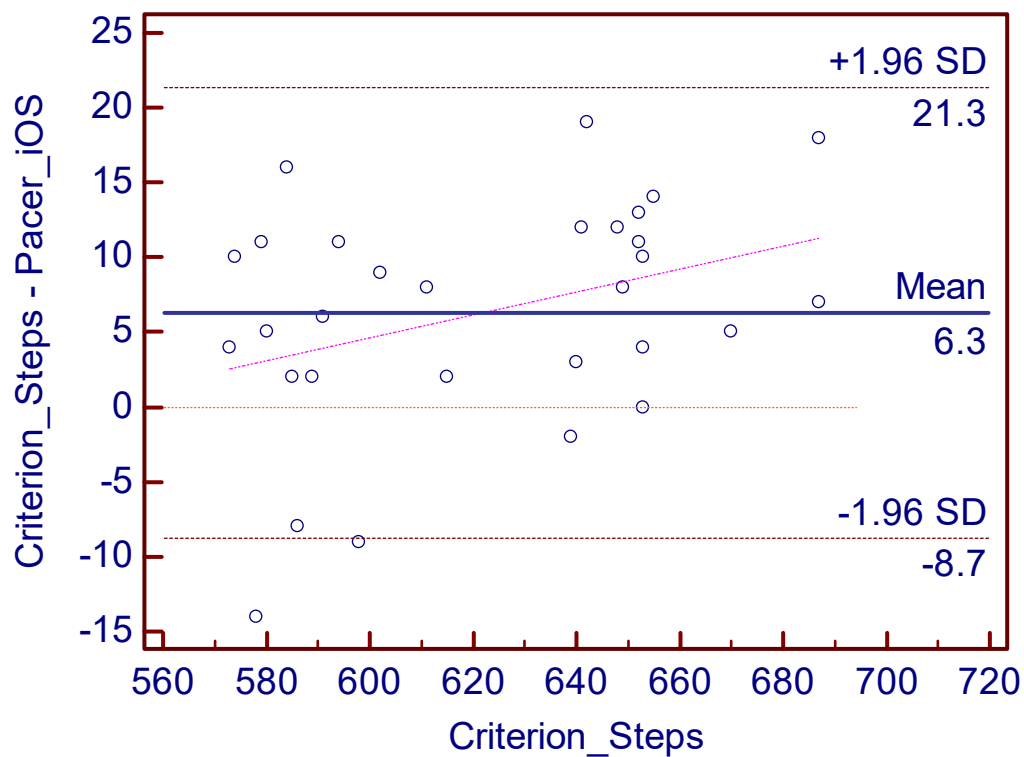

**Figure S11.** Bland-Altman plot for *Pacer iOS* step estimates during walking at 6.0 km/h compared with criterion measure.

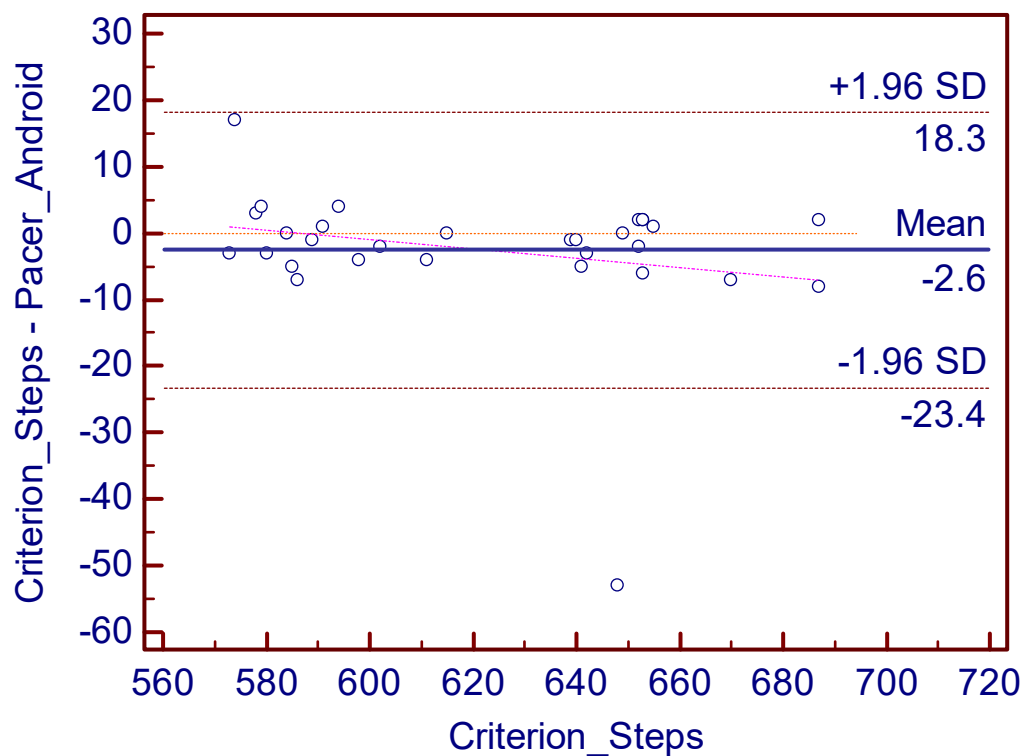

**Figure S12.** Bland-Altman plot for *Pacer Android* step estimates during walking at 6.0 km/h compared with criterion measure.

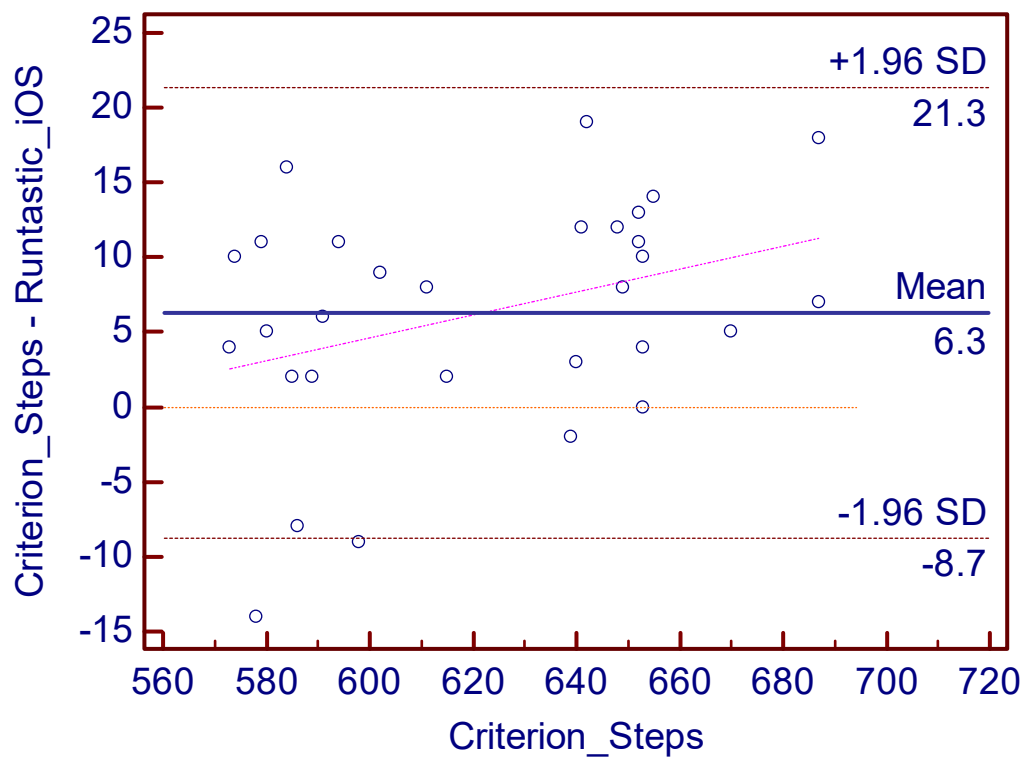

**Figure S13.** Bland-Altman plot for *Runtastic iOS* step estimates during walking at 6.0 km/h compared with criterion measure.

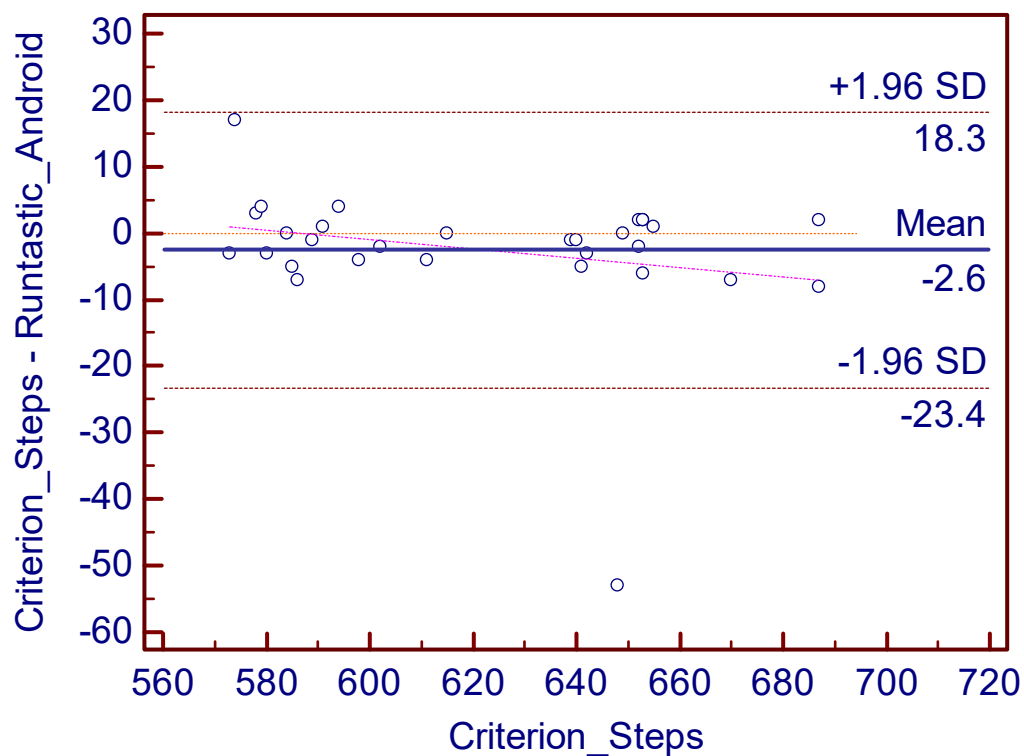

**Figure S14.** Bland-Altman plot for *Runtastic Android* step estimates during walking at 6.0 km/h compared with criterion measure.

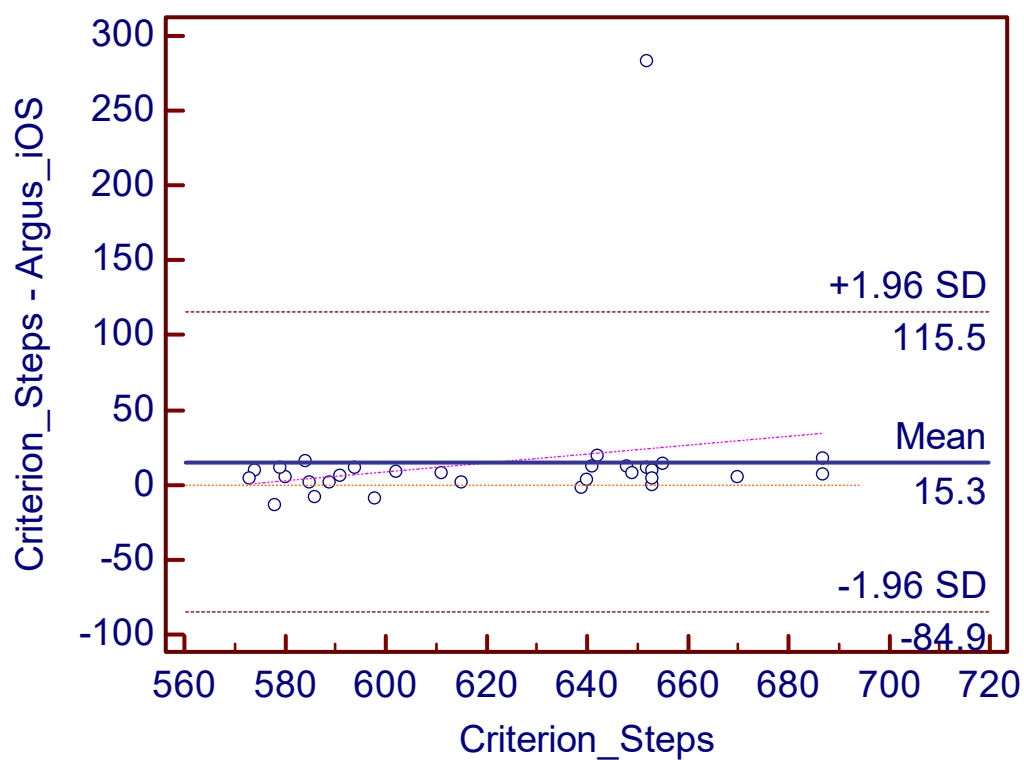

**Figure S15.** Bland-Altman plot for *Argus iOS* step estimates during walking at 6.0 km/h compared with criterion measure.

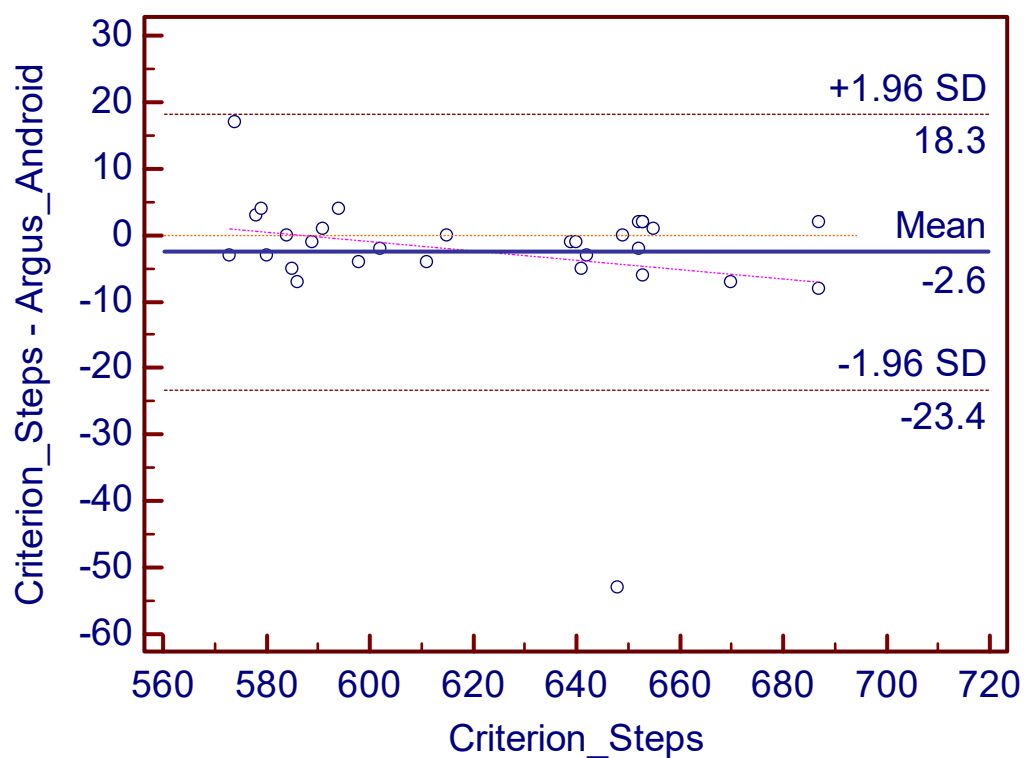

**Figure S16.** Bland-Altman plot for *Argus Android* step estimates during walking at 6.0 km/h compared with criterion measure.



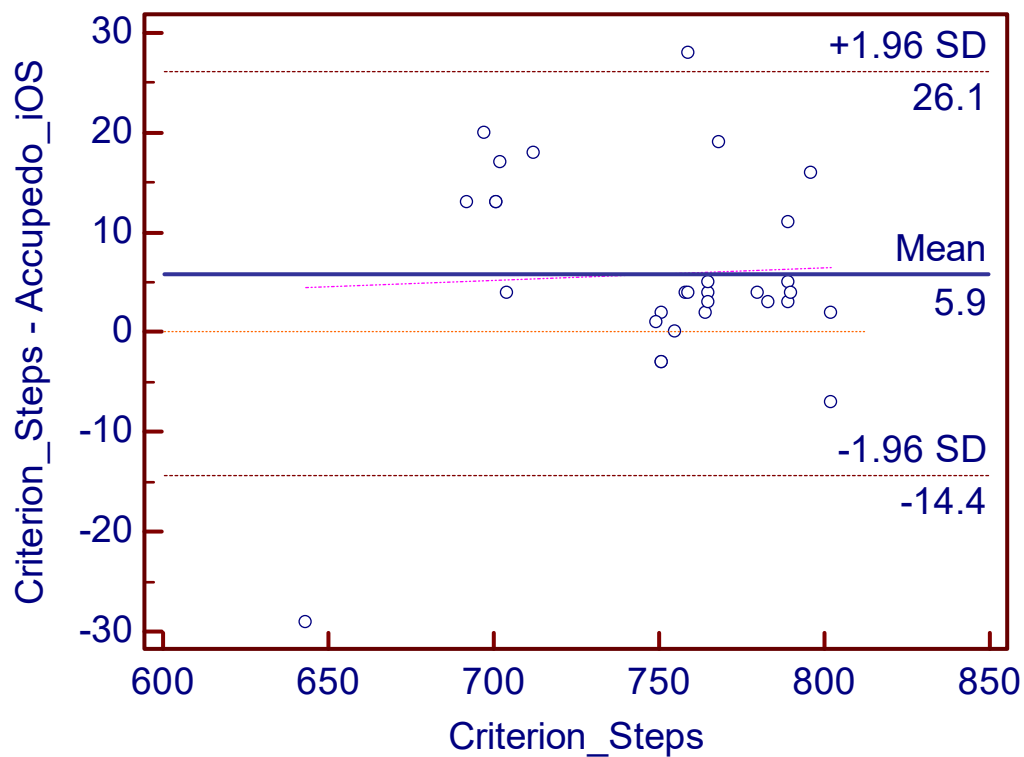

**Figure S17.** Bland-Altman plot for *Accupedo iOS* step estimates during walking at 8.4 km/h compared with criterion measure.

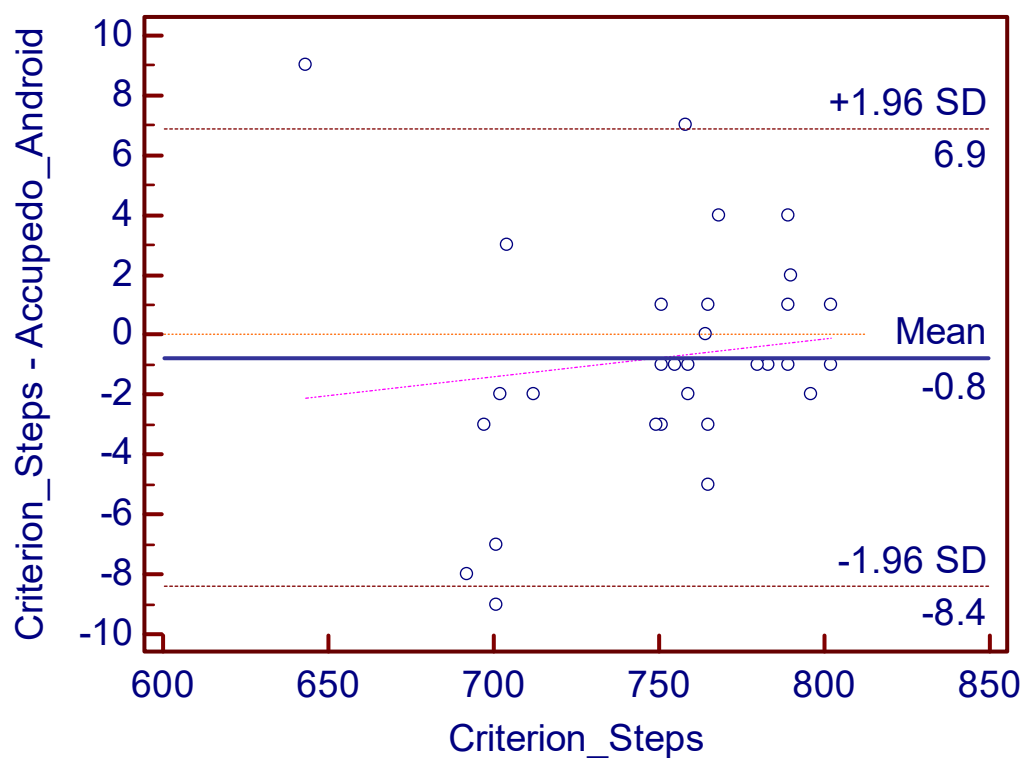

**Figure S18.** Bland-Altman plot for *Accupedo Android* step estimates during walking at 8.4 km/h compared with criterion measure.

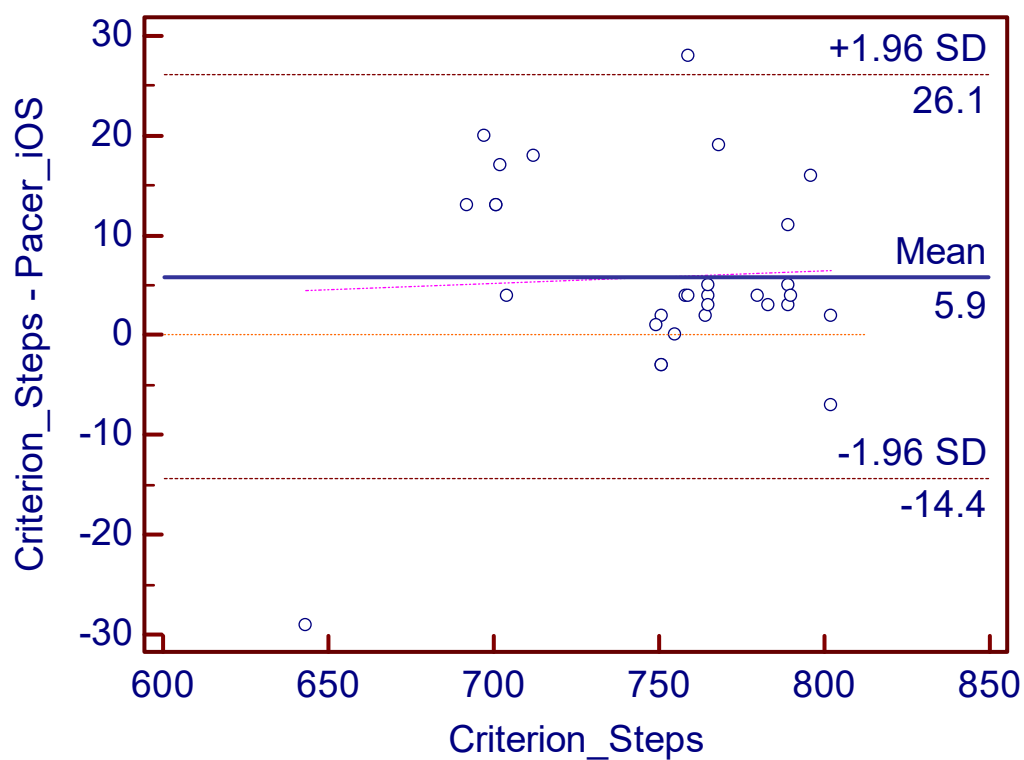

**Figure S19.** Bland-Altman plot for *Pacer iOS* step estimates during walking at 8.4 km/h compared with criterion measure.

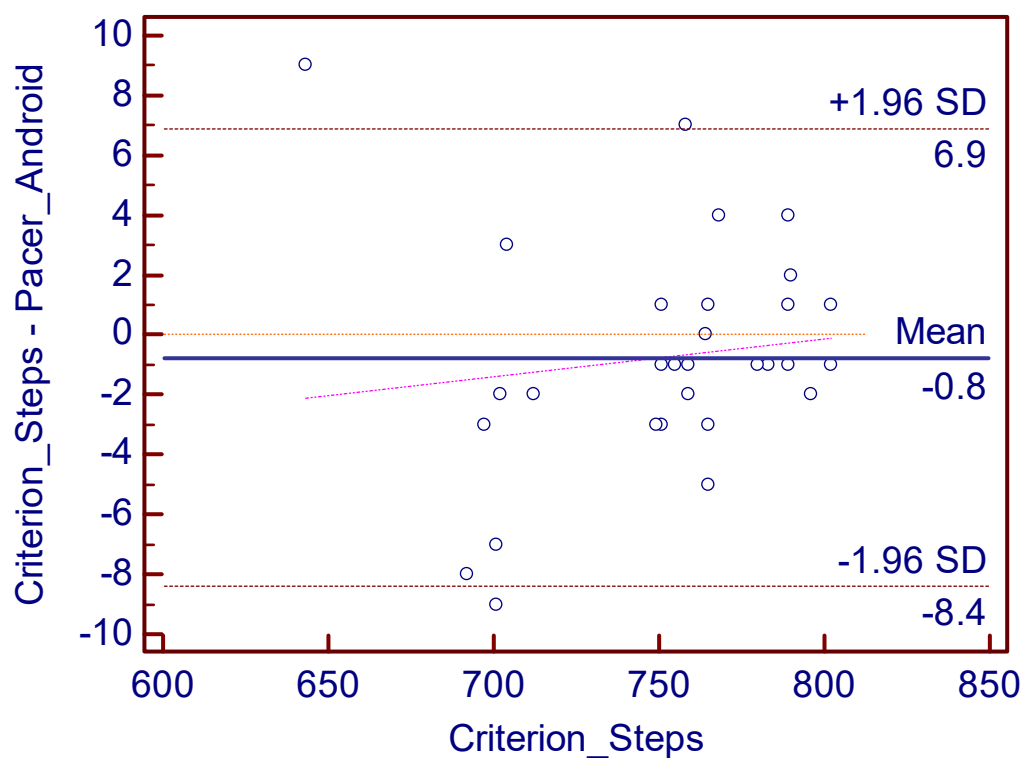

**Figure S20.** Bland-Altman plot for *Pacer Android* step estimates during walking at 8.4 km/h compared with criterion measure.

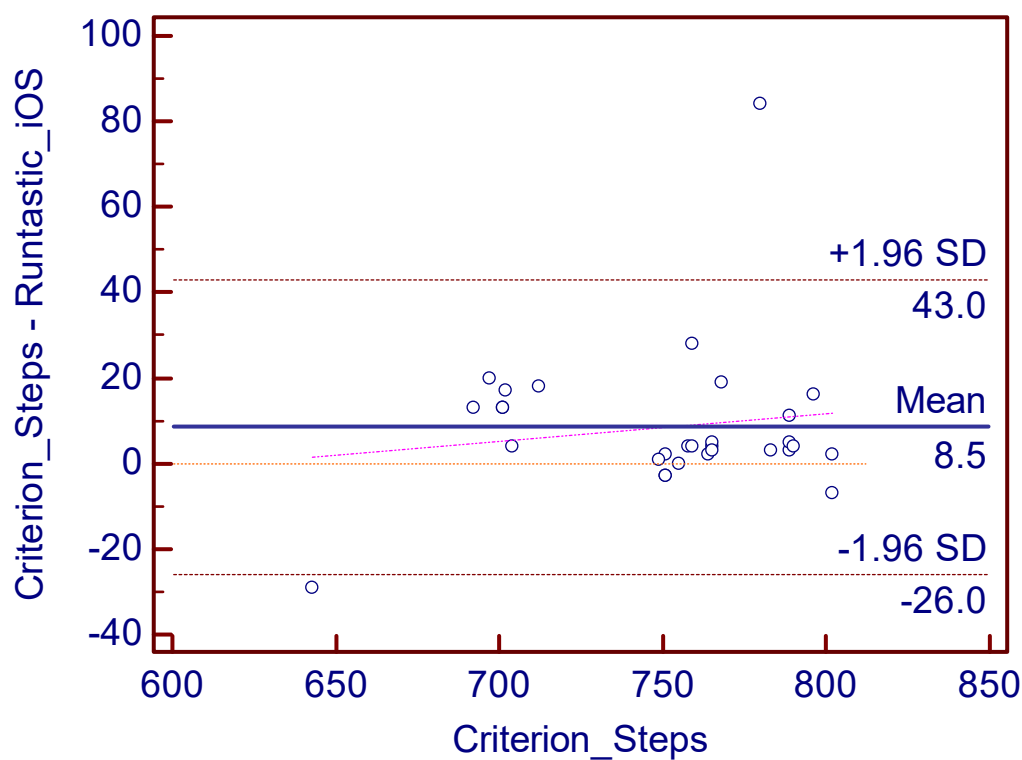

**Figure S21.** Bland-Altman plot for *Runtastic iOS* step estimates during walking at 8.4 km/h compared with criterion measure.

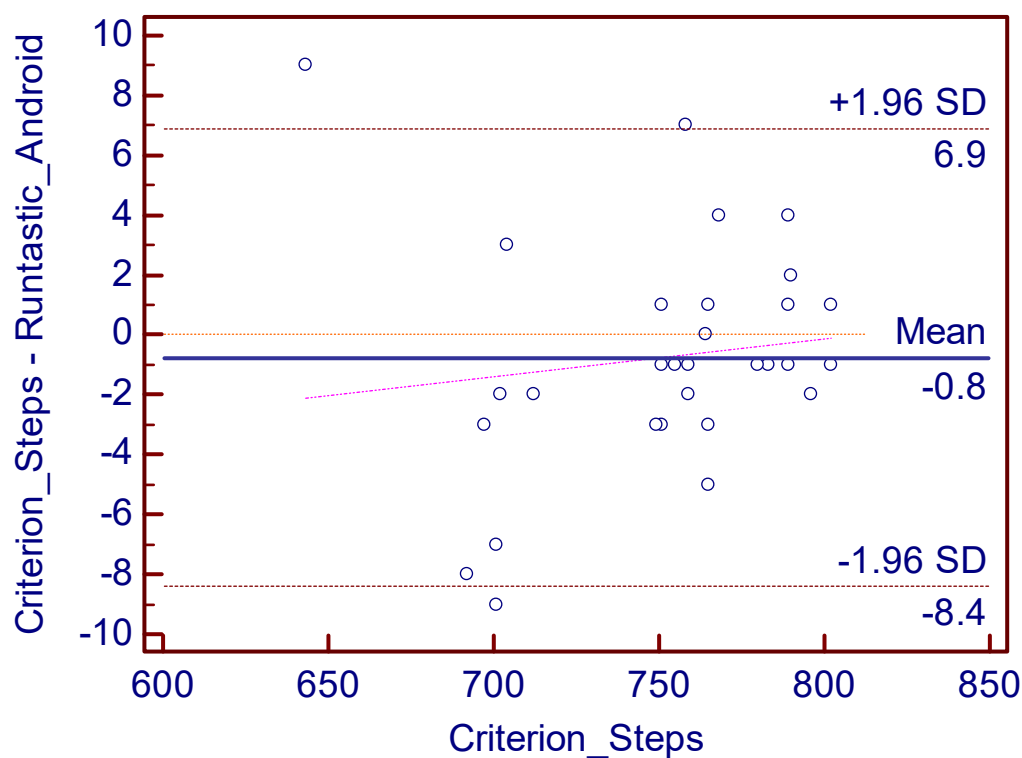

**Figure S22.** Bland-Altman plot for *Runtastic Android* step estimates during walking at 8.4 km/h compared with criterion measure.

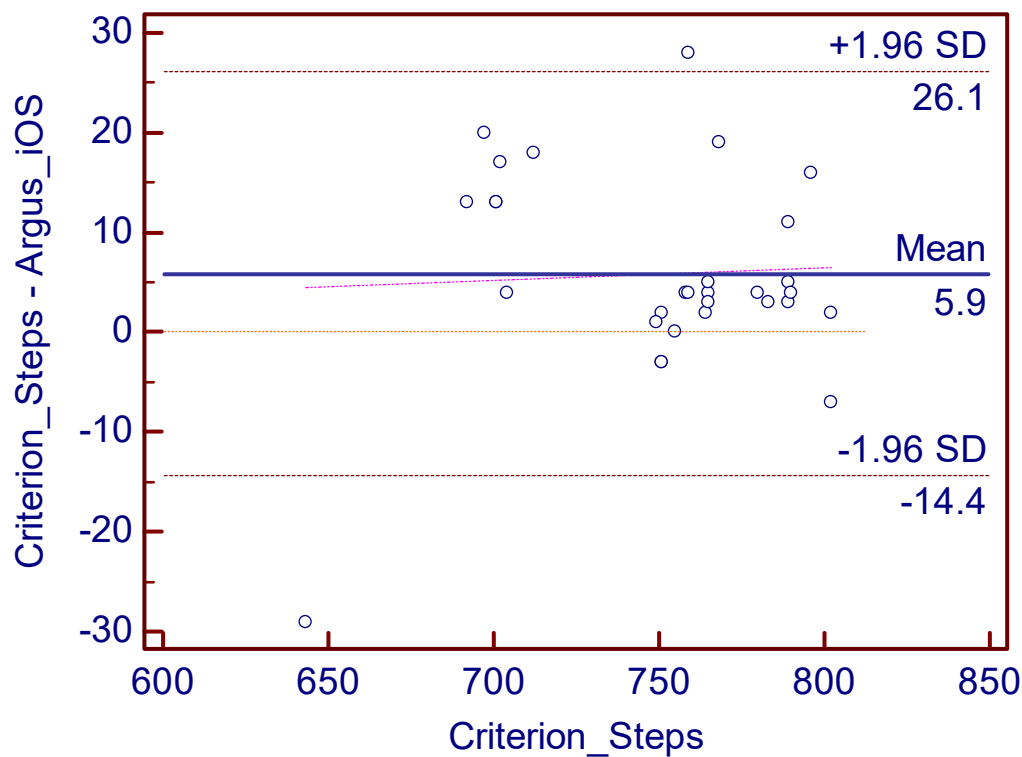

**Figure S23.** Bland-Altman plot for *Argus iOS* step estimates during walking at 8.4 km/h compared with criterion measure.

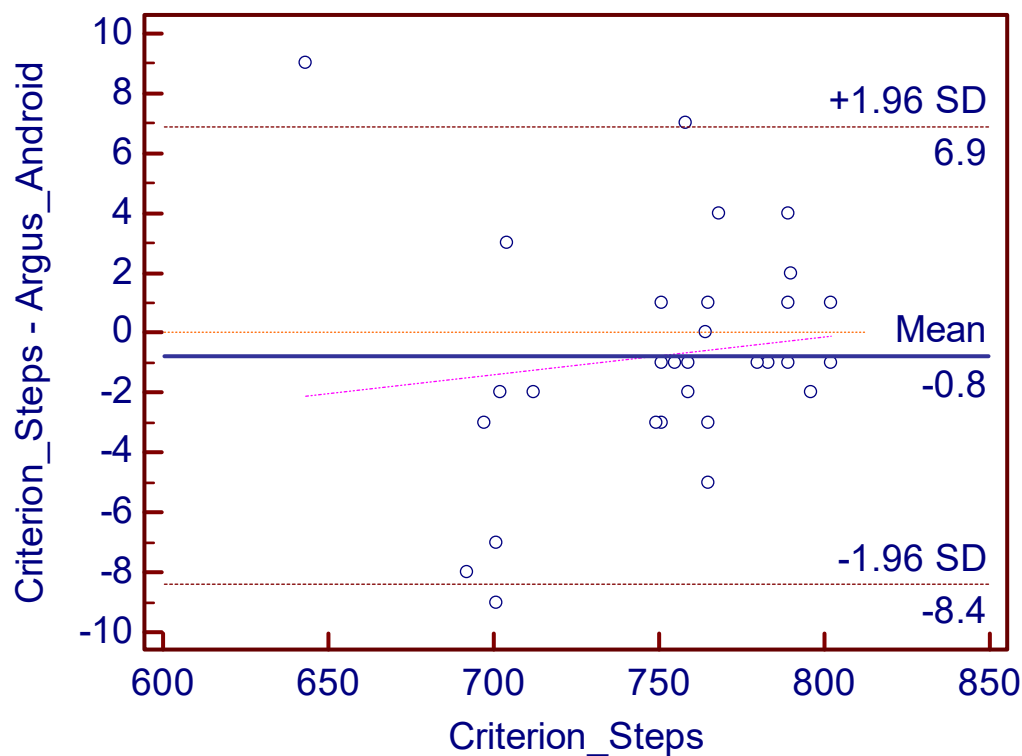

**Figure S24.** Bland-Altman plot for *Argus Android* step estimates during walking at 8.4 km/h compared with criterion measure.

## Bland-Altman plots for distance

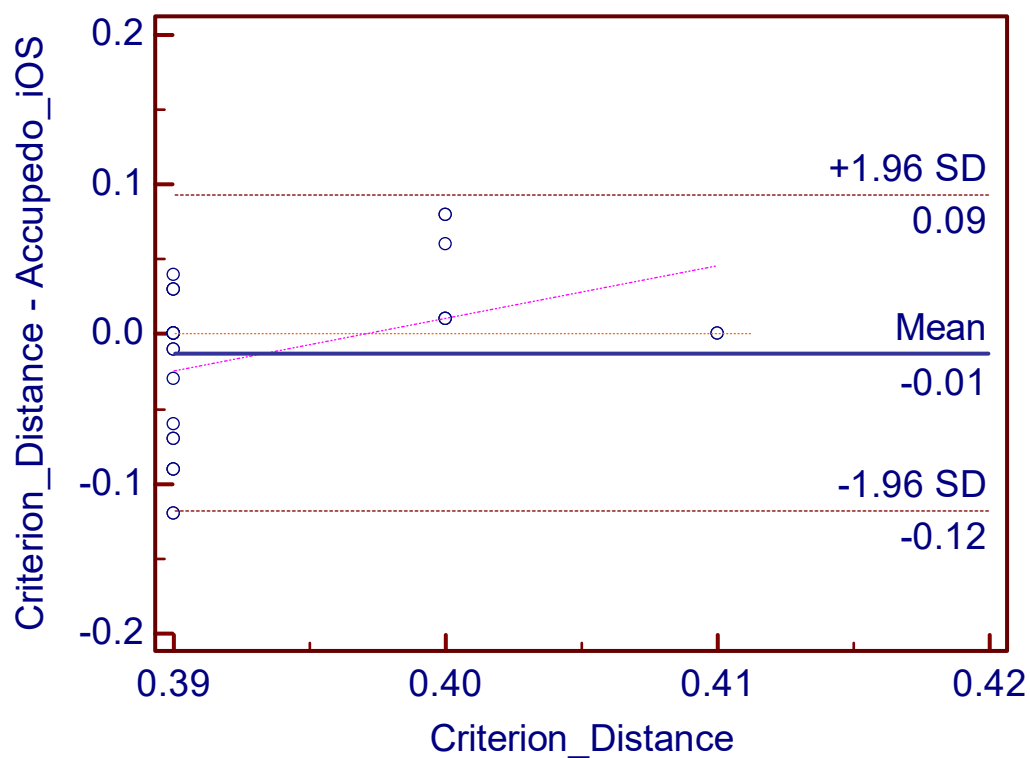

**Figure S25.** Bland-Altman plot for *AccuPedo iOS* distance estimates during walking at 4.8 km/h compared with criterion measure.

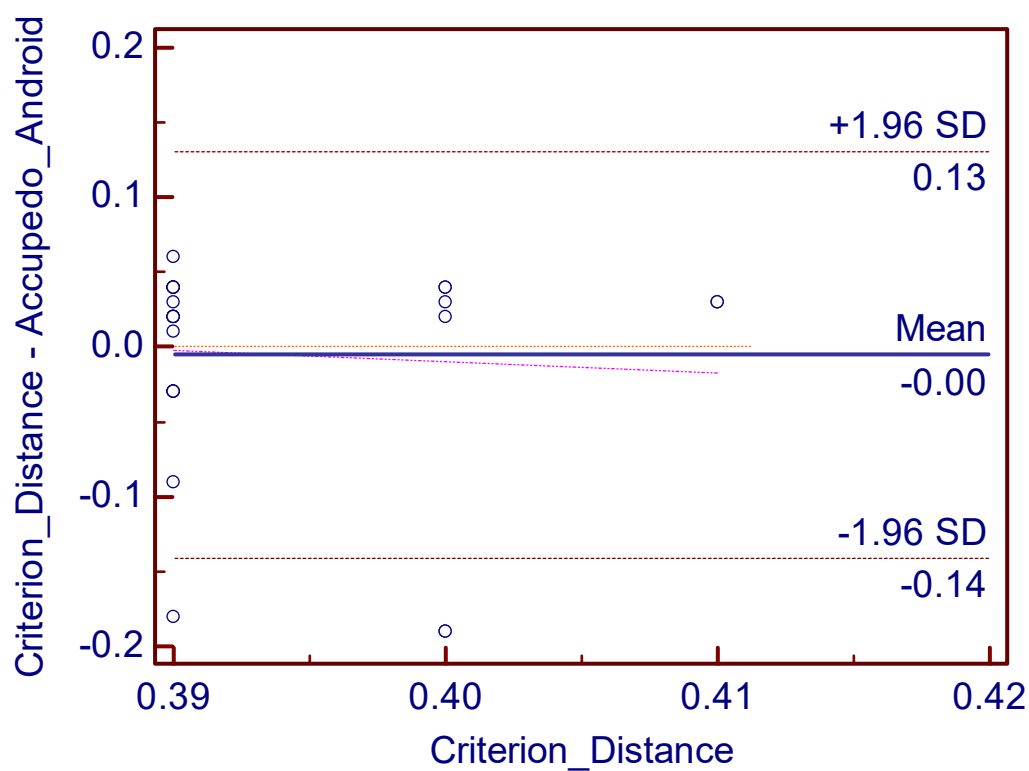

**Figure S26.** Bland-Altman plot for *AccuPedo Android* distance estimates during walking at 8.4 km/h compared with criterion measure.

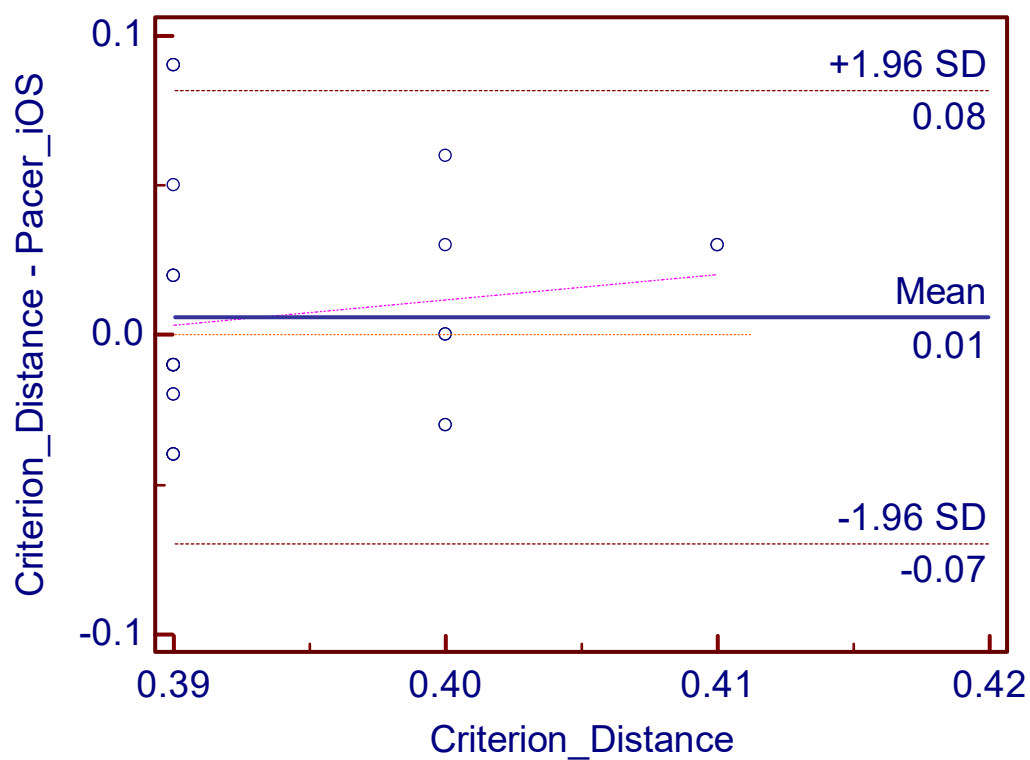

**Figure S27.** Bland-Altman plot for *Pacer iOS* distance estimates during walking at 4.8 km/h compared with criterion measure.

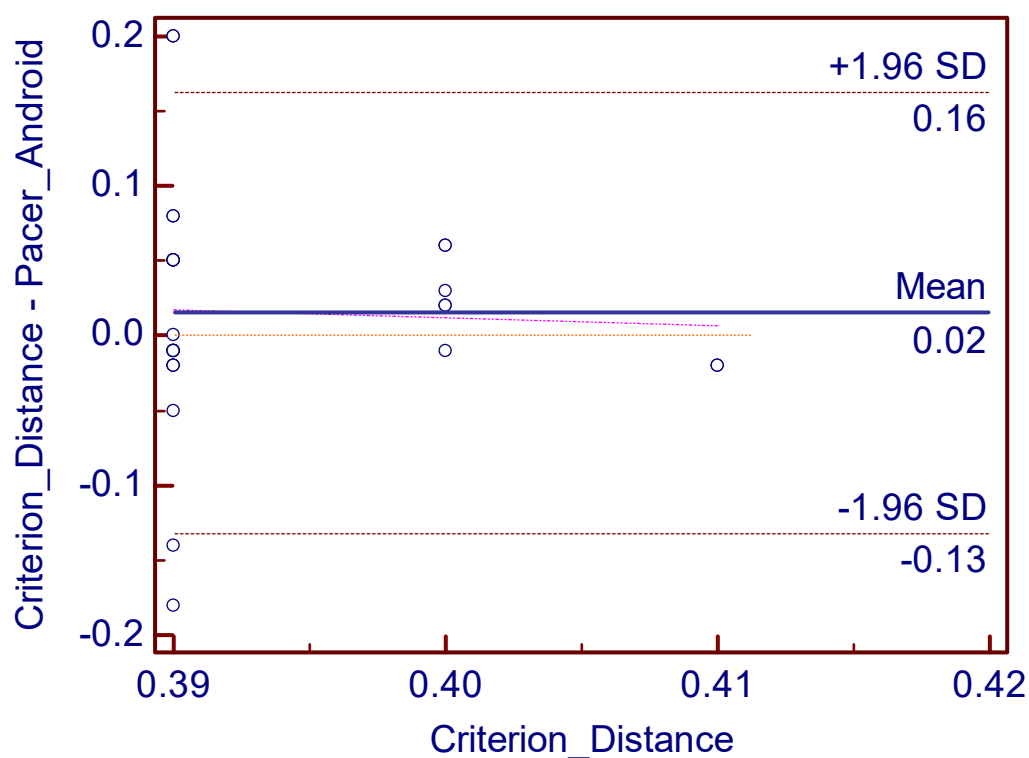

**Figure S28.** Bland-Altman plot for *Pacer Android* distance estimates during walking at 4.8 km/h compared with criterion measure.

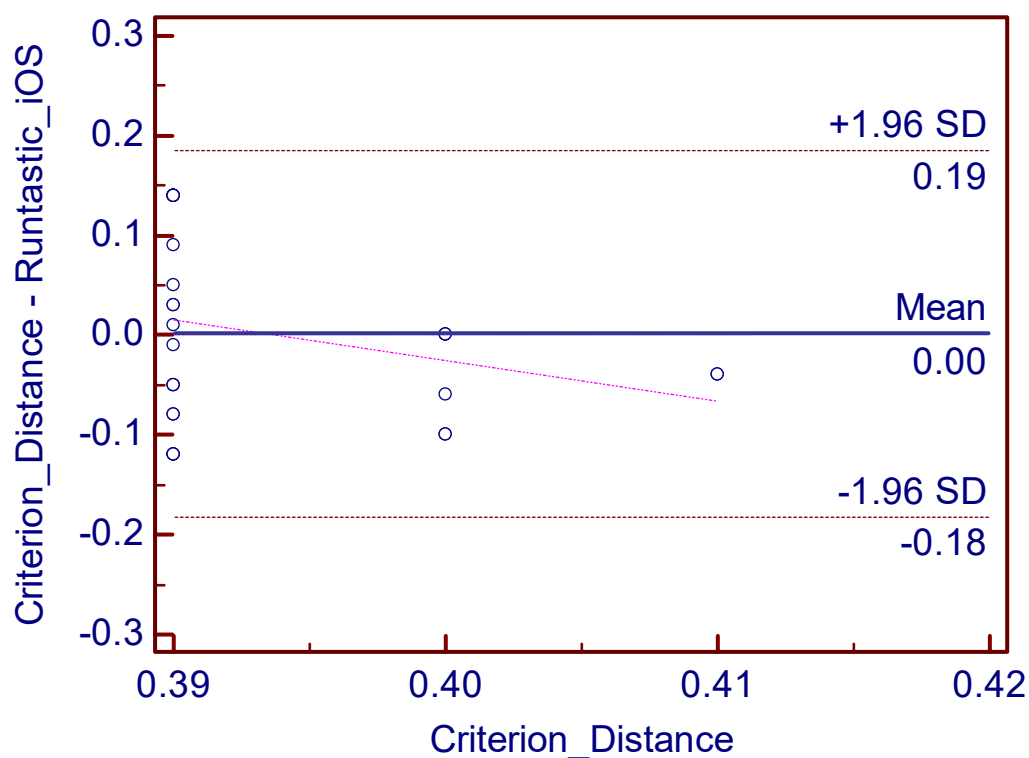

**Figure S29.** Bland-Altman plot for *Runtastic iOS* distance estimates during walking at 4.8 km/h compared with criterion measure.

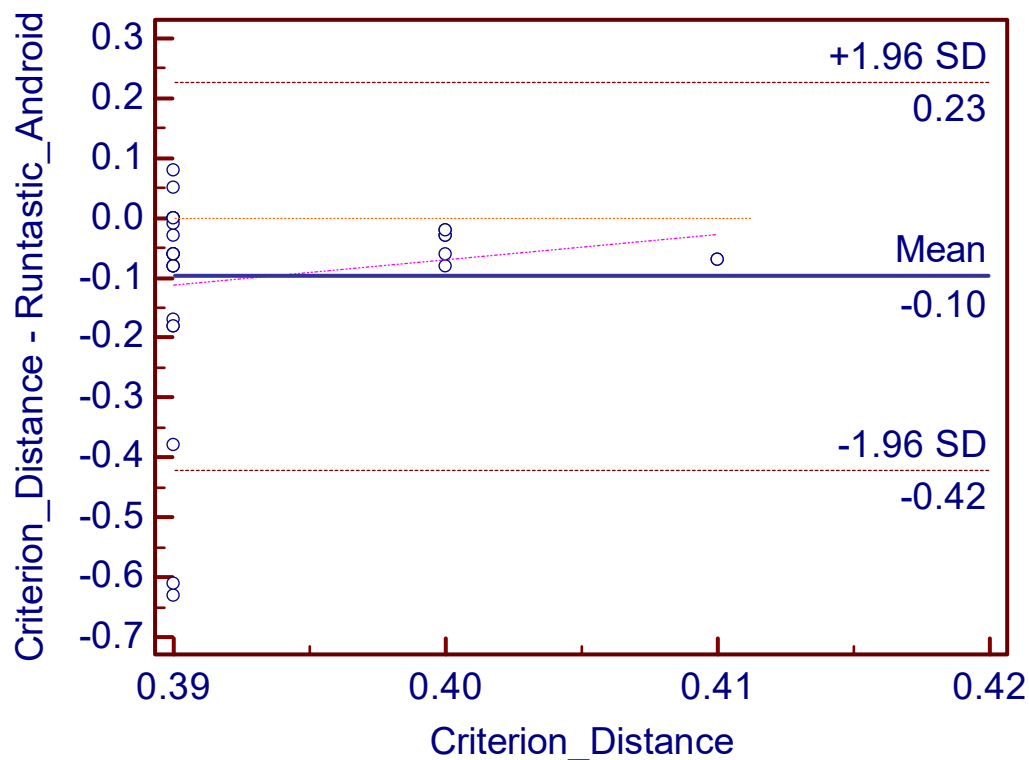

**Figure S30.** Bland-Altman plot for *Runtastic Android* distance estimates during walking at 4.8 km/h compared with criterion measure.

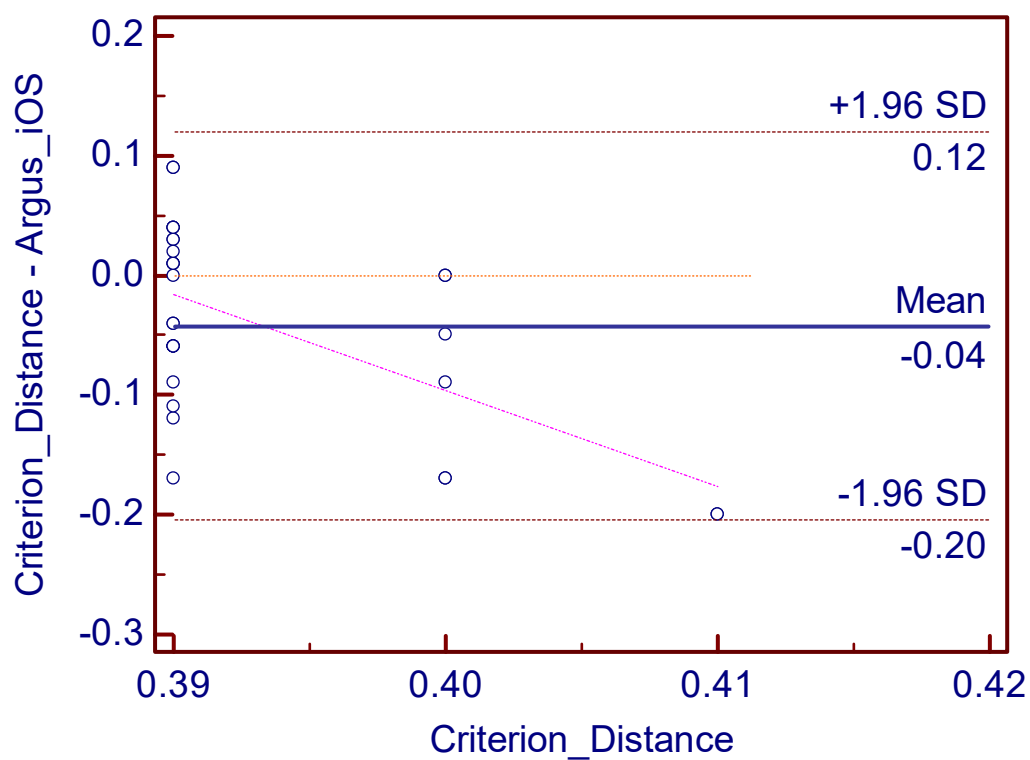

**Figure S31.** Bland-Altman plot for *Argus iOS* distance estimates during walking at 4.8 km/h compared with criterion measure.

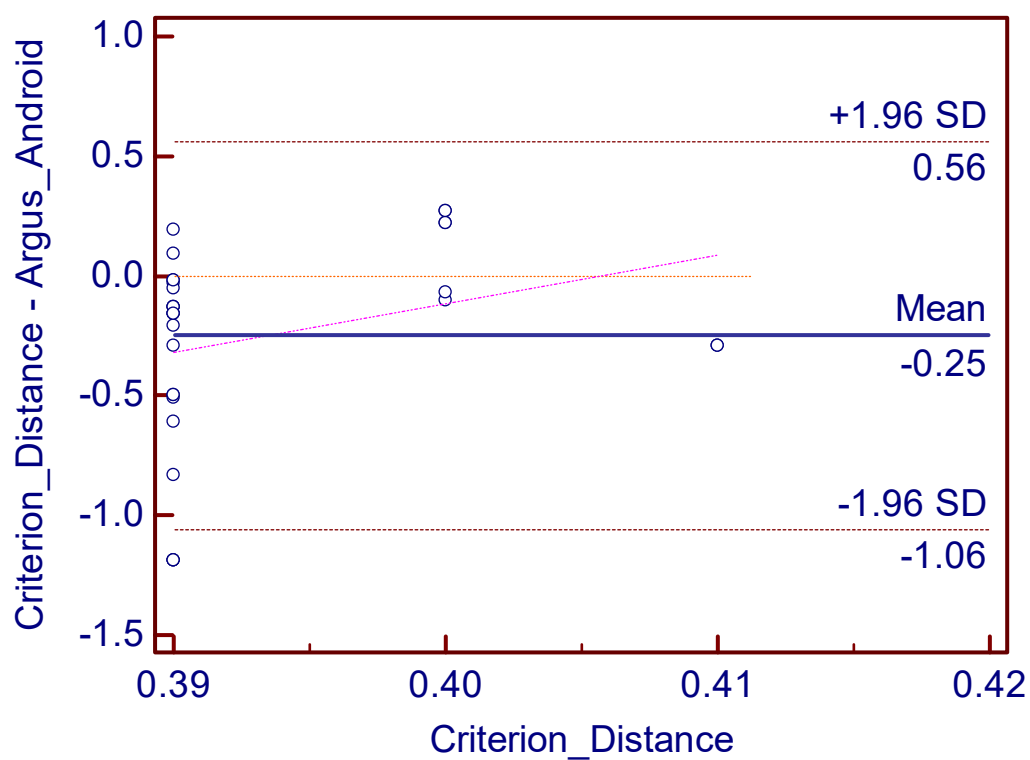

**Figure S32.** Bland-Altman plot for *Argus Android* distance estimates during walking at 4.8 km/h compared with criterion measure.



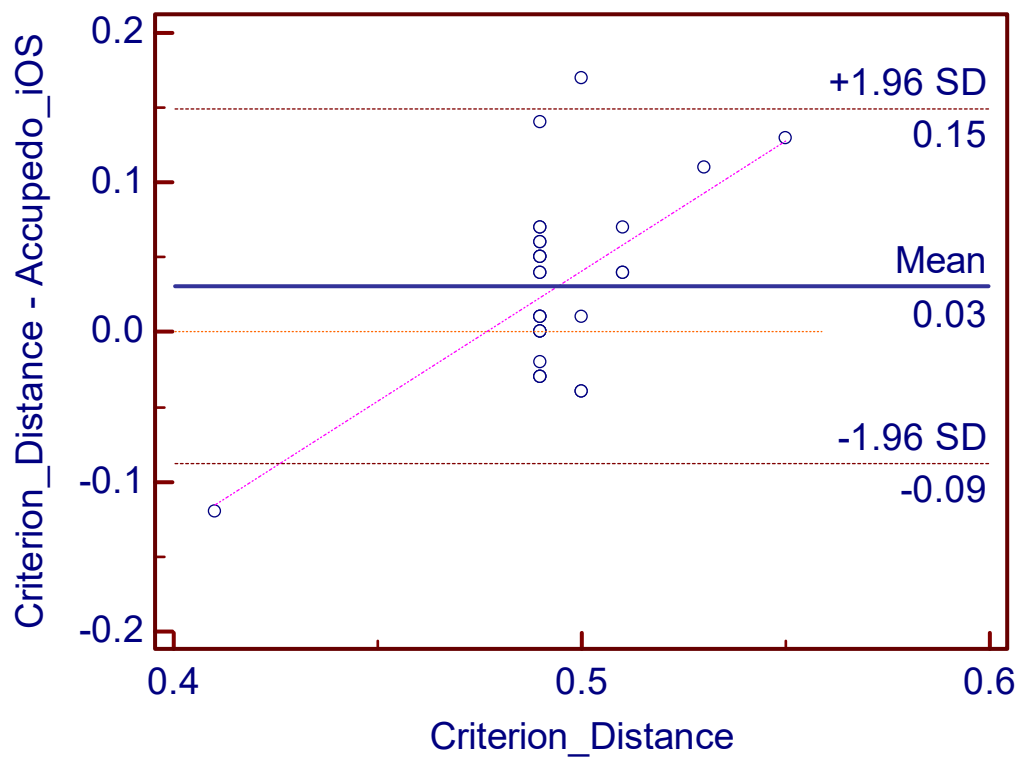

**Figure S33.** Bland-Altman plot for *Accupedo iOS* distance estimates during walking at 6.0 km/h compared with criterion measure.

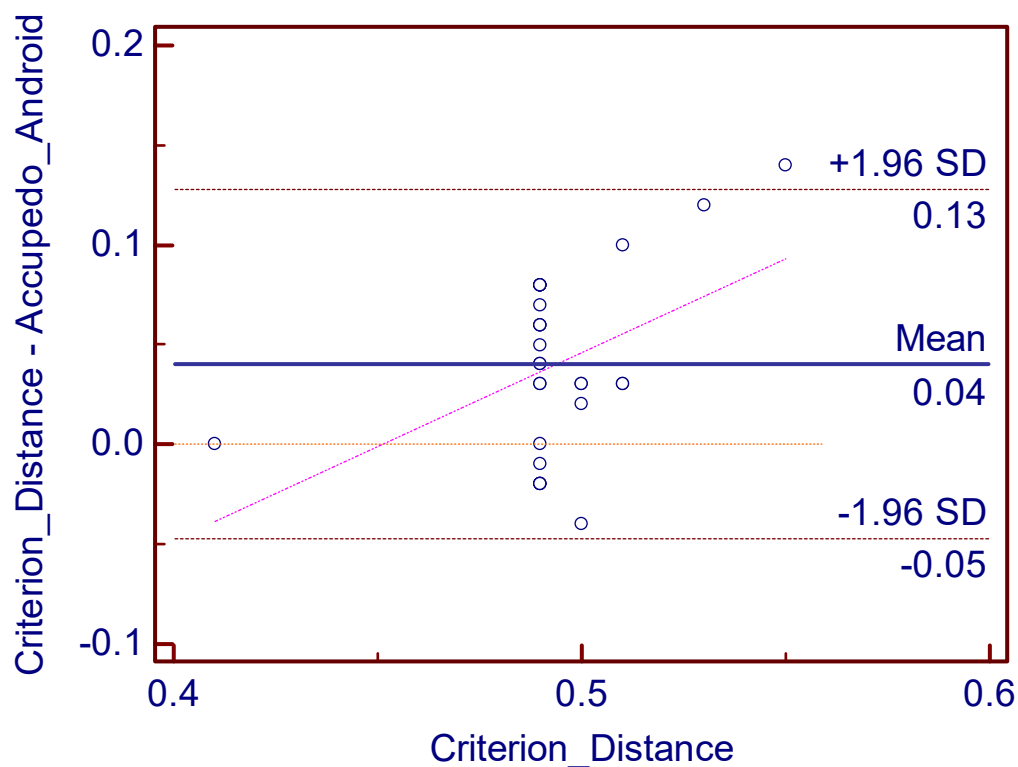

**Figure S34.** Bland-Altman plot for *Accupedo Android* distance estimates during walking at 6.0 km/h compared with criterion measure.

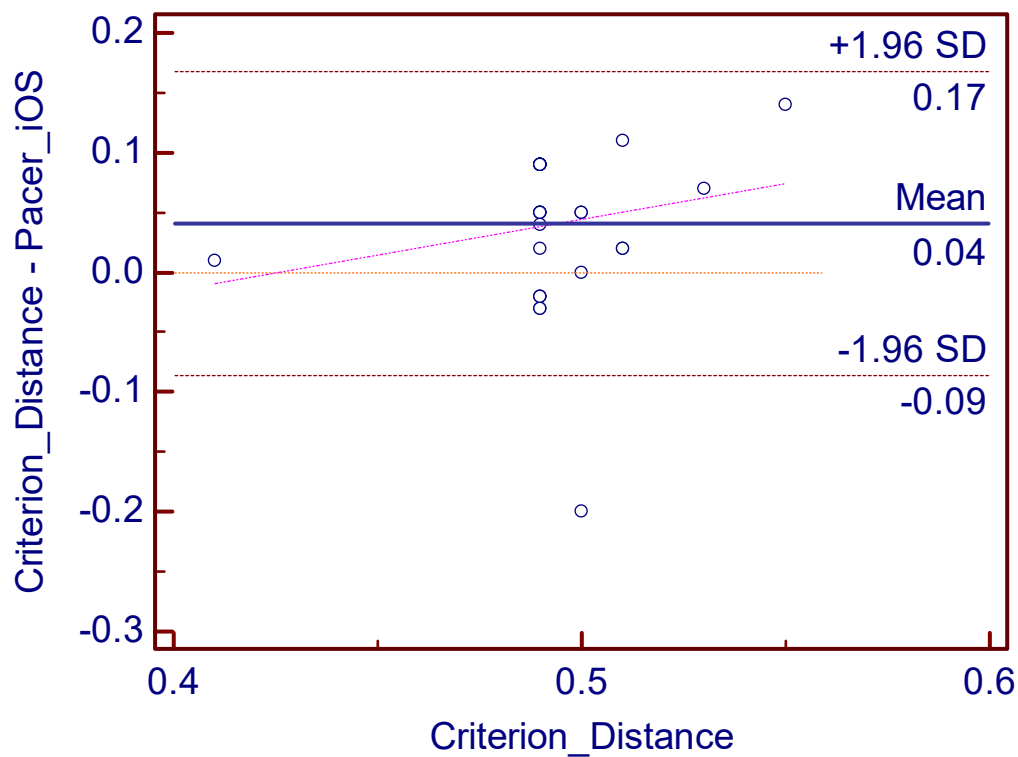

**Figure S35.** Bland-Altman plot for *Pacer iOS* distance estimates during walking at 6.0 km/h compared with criterion measure.

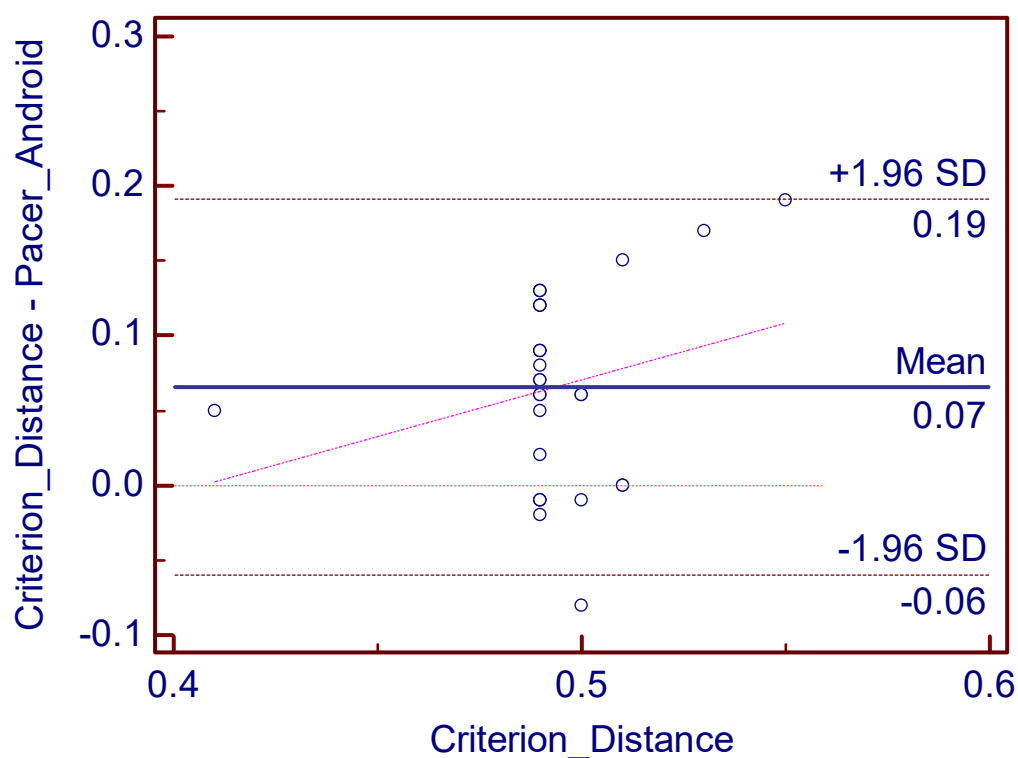

**Figure S36.** Bland-Altman plot for *Pacer Android* distance estimates during walking at 6.0 km/h compared with criterion measure.

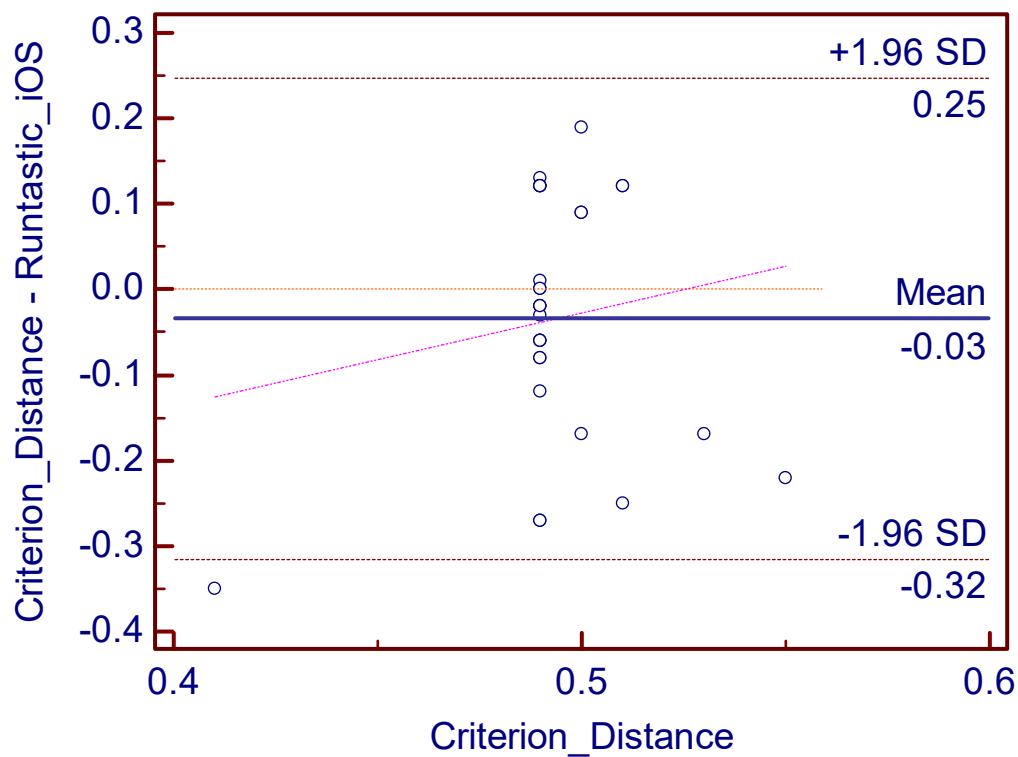

**Figure S37.** Bland-Altman plot for *Runtastic iOS* distance estimates during walking at 6.0 km/h compared with criterion measure.

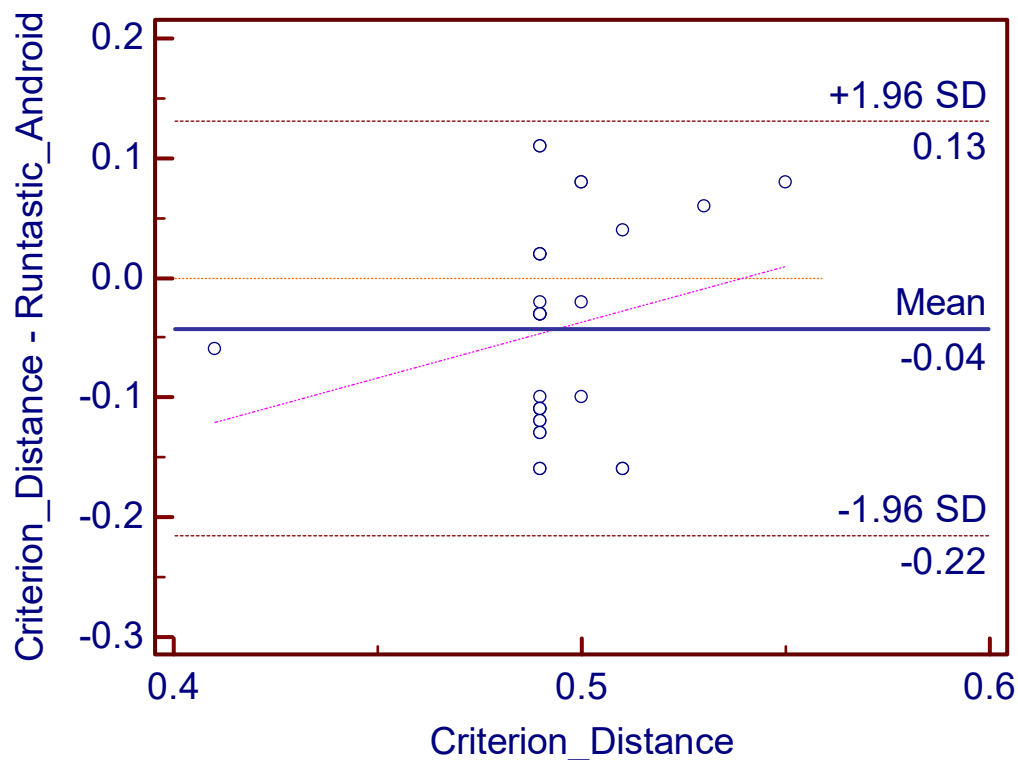

**Figure S38.** Bland-Altman plot for *Runtastic Android* distance estimates during walking at 6.0 km/h compared with criterion measure.

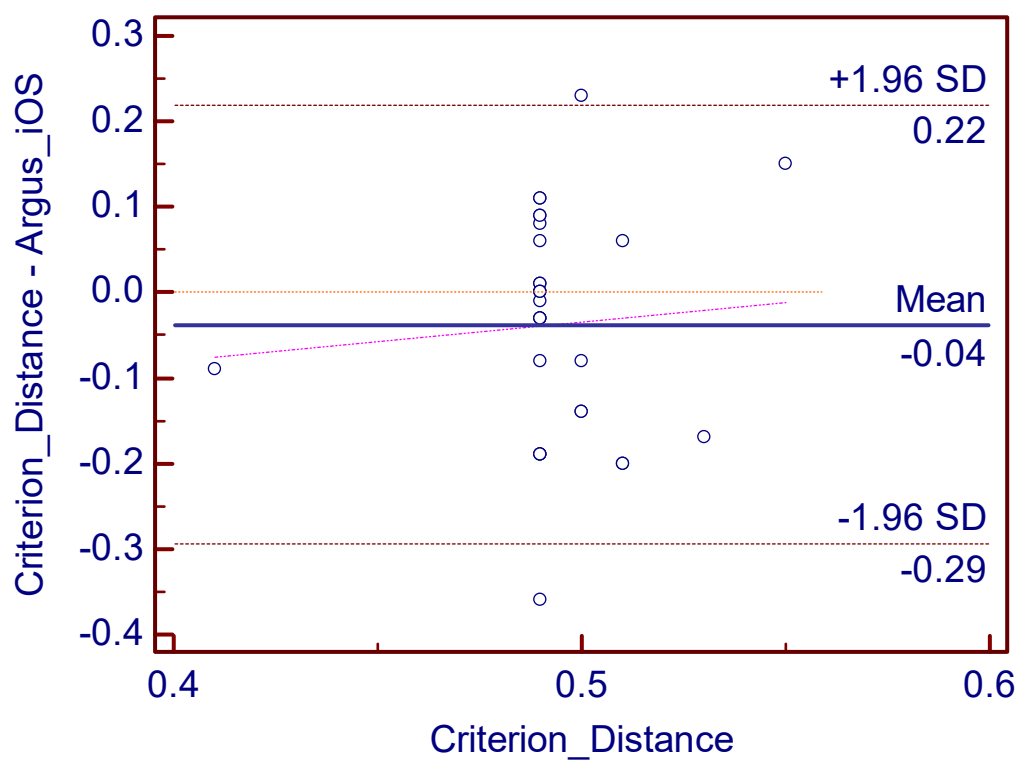

**Figure S39.** Bland-Altman plot for *Argus iOS* distance estimates during walking at 6.0 km/h compared with criterion measure.

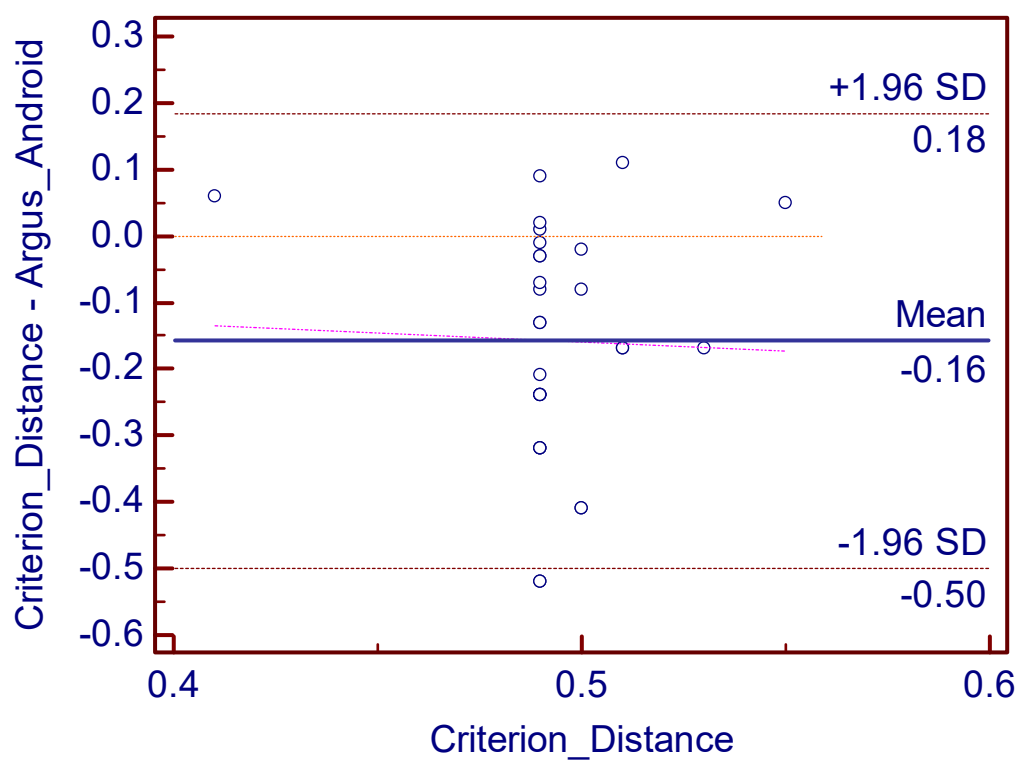

**Figure S40.** Bland-Altman plot for *Argus Android* distance estimates during walking at 6.0 km/h compared with criterion measure.

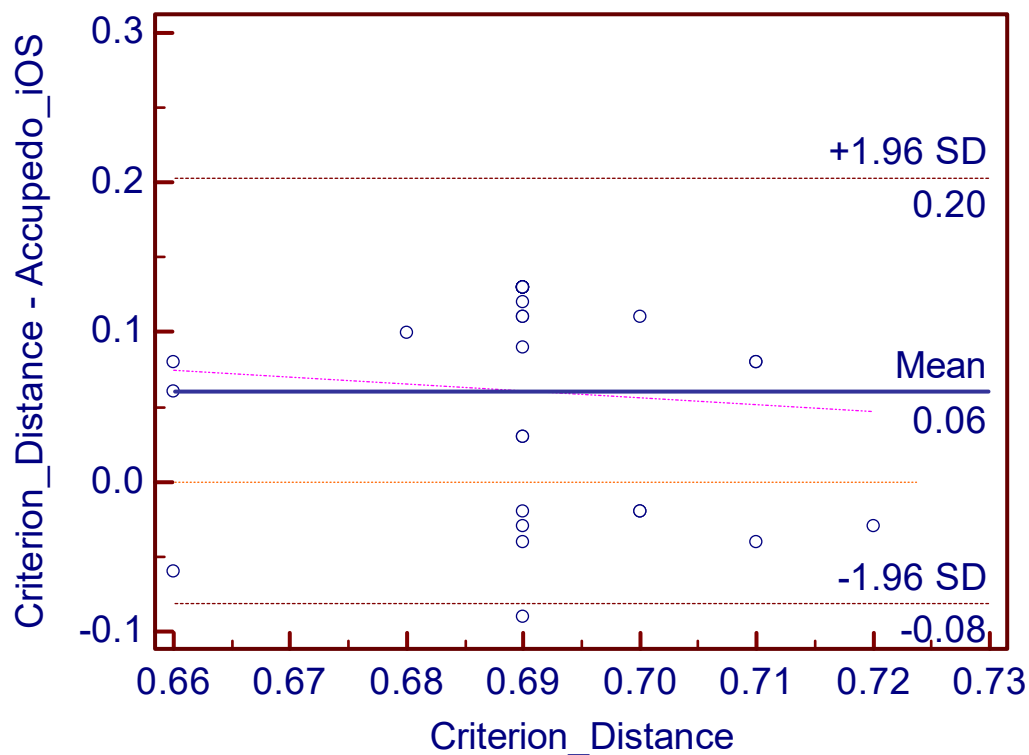

**Figure S41.** Bland-Altman plot for *Accupedo iOS* distance estimates during walking at 8.4 km/h compared with criterion measure.

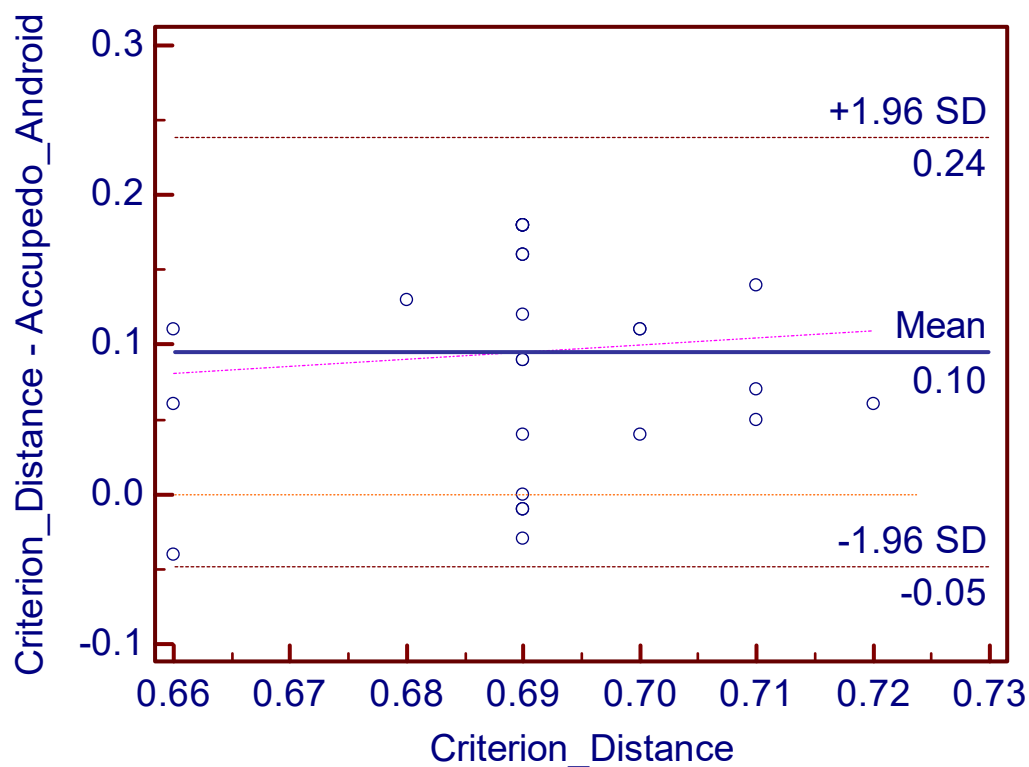

**Figure S42.** Bland-Altman plot for *Accupedo Android* distance estimates during walking at 8.4 km/h compared with criterion measure.

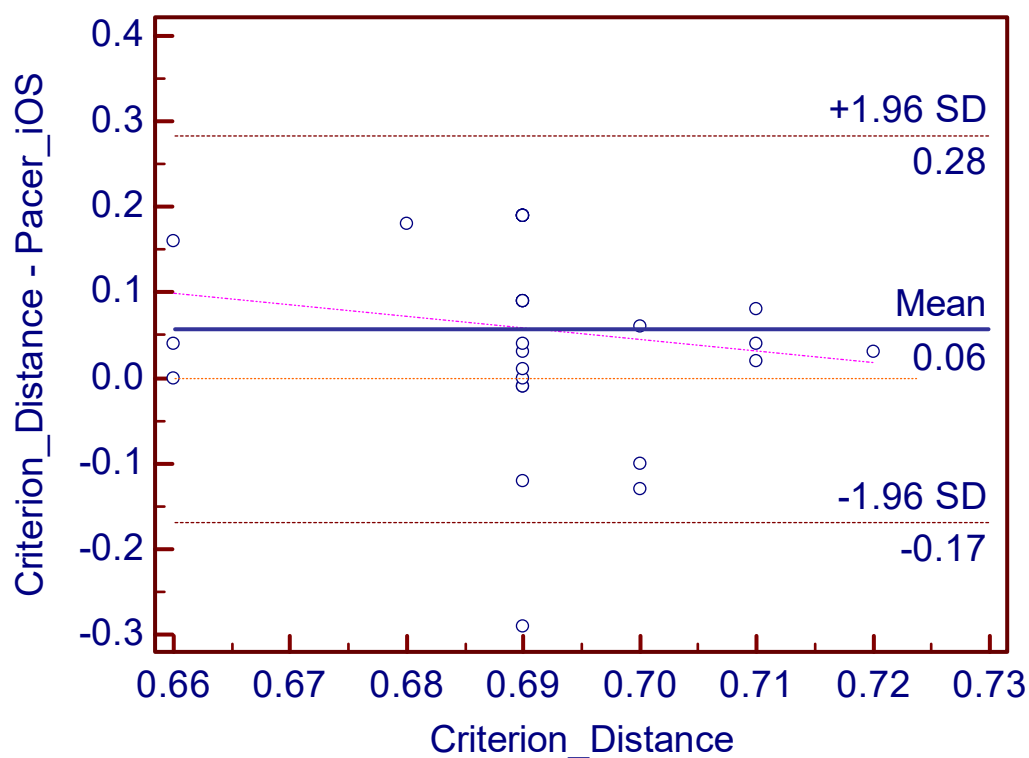

**Figure S43.** Bland-Altman plot for *Pacer iOS* distance estimates during walking at 8.4 km/h compared with criterion measure.

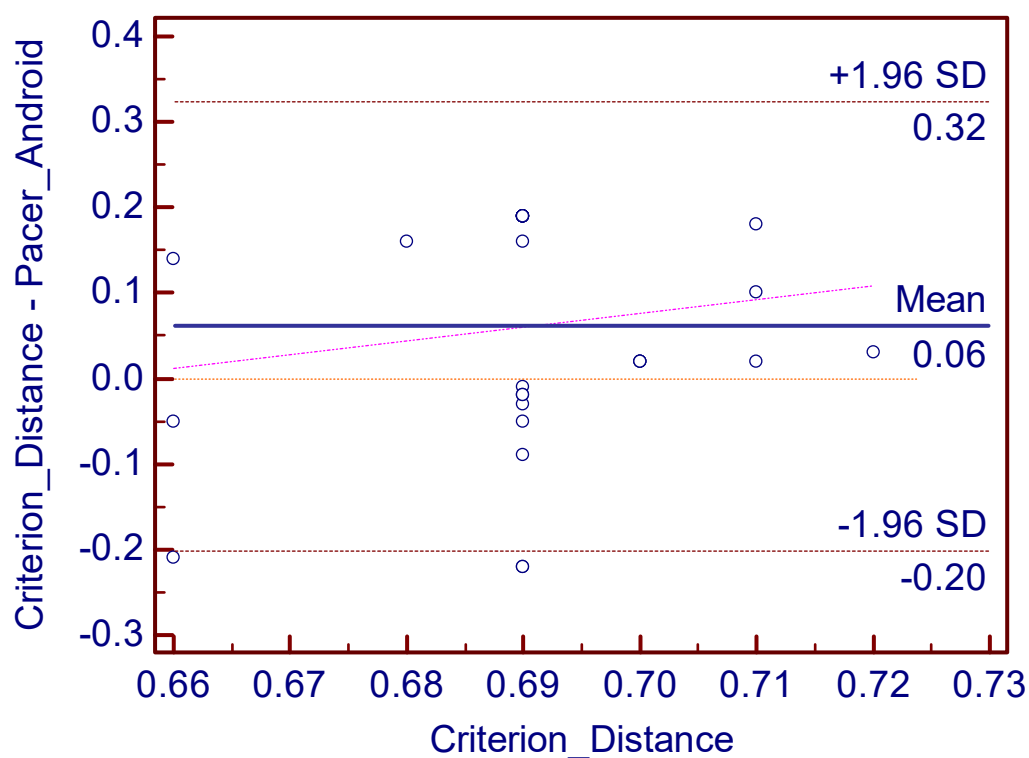

**Figure S44.** Bland-Altman plot for *Pacer Android* distance estimates during walking at 8.4 km/h compared with criterion measure.

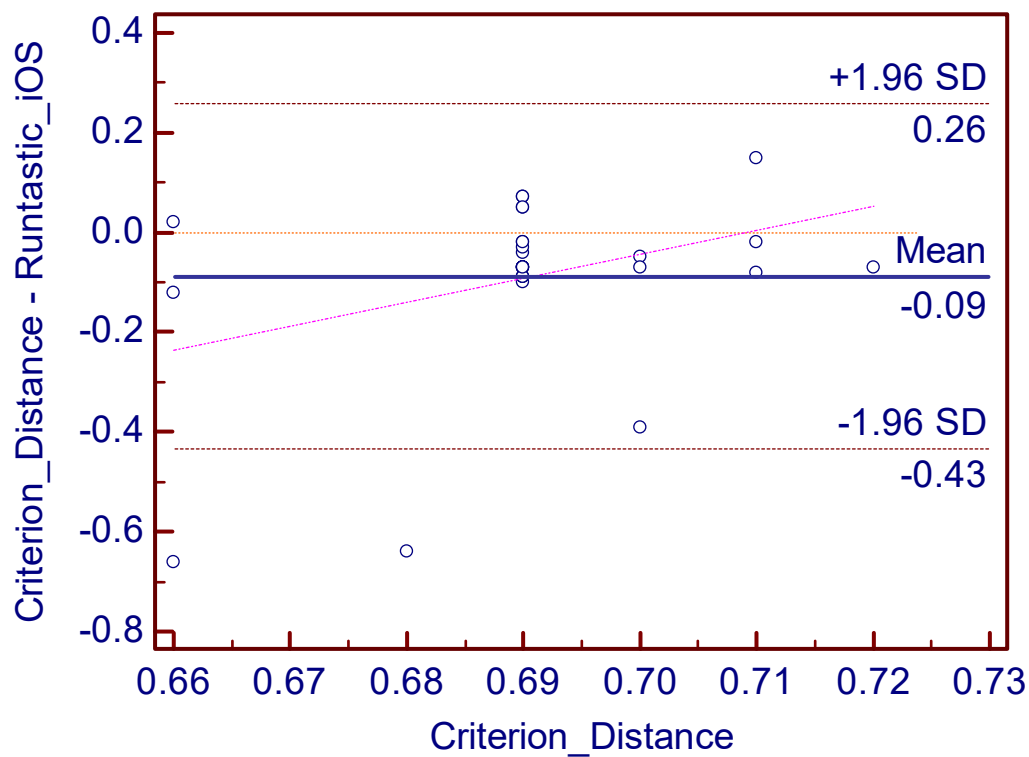

**Figure S45.** Bland-Altman plot for *Runtastic iOS* distance estimates during walking at 8.4 km/h compared with criterion measure.

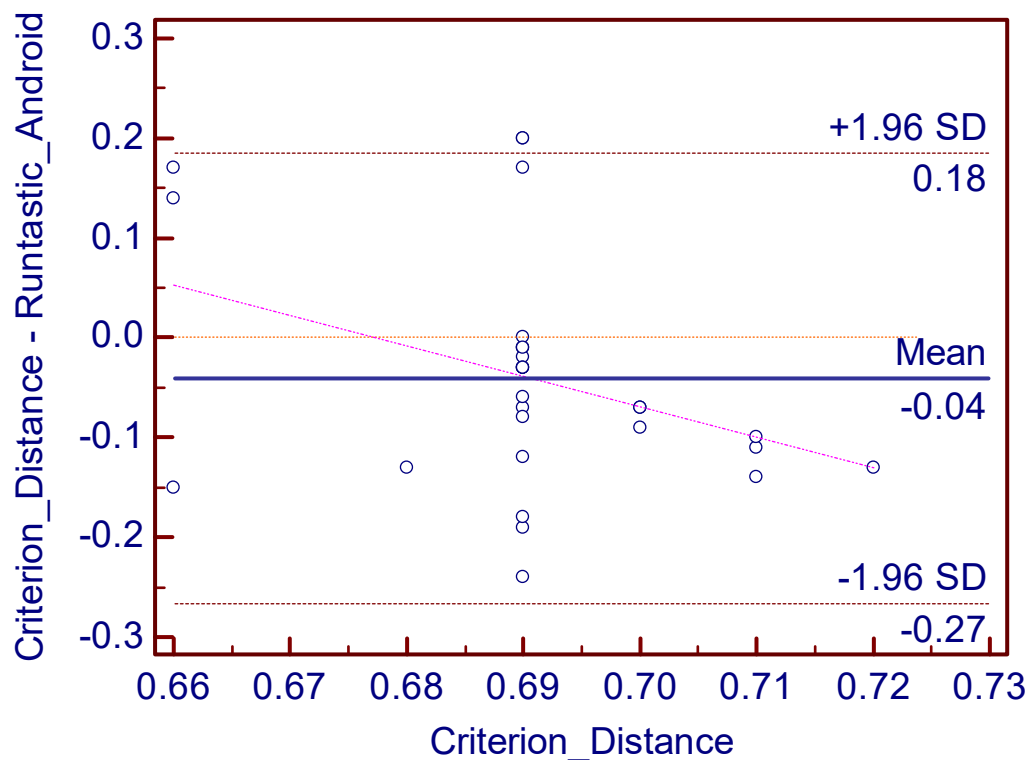

**Figure S46.** Bland-Altman plot for *Runtastic Android* distance estimates during walking at 8.4 km/h compared with criterion measure.

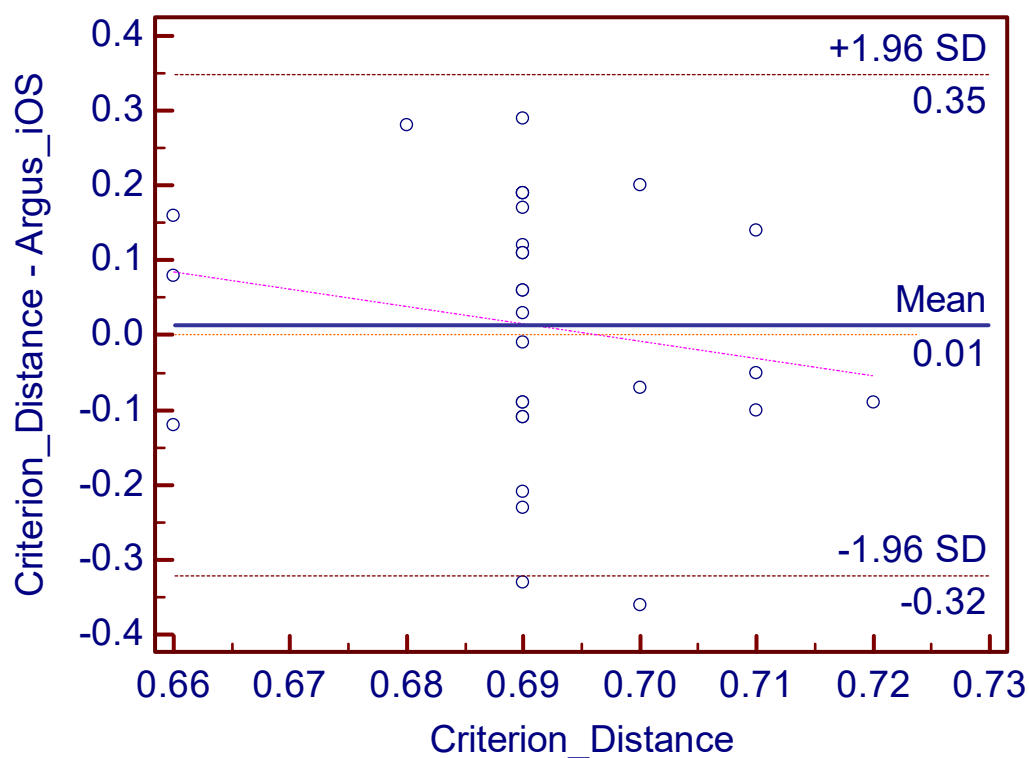

**Figure S47.** Bland-Altman plot for *Argus iOS* distance estimates during walking at 8.4 km/h compared with criterion measure.

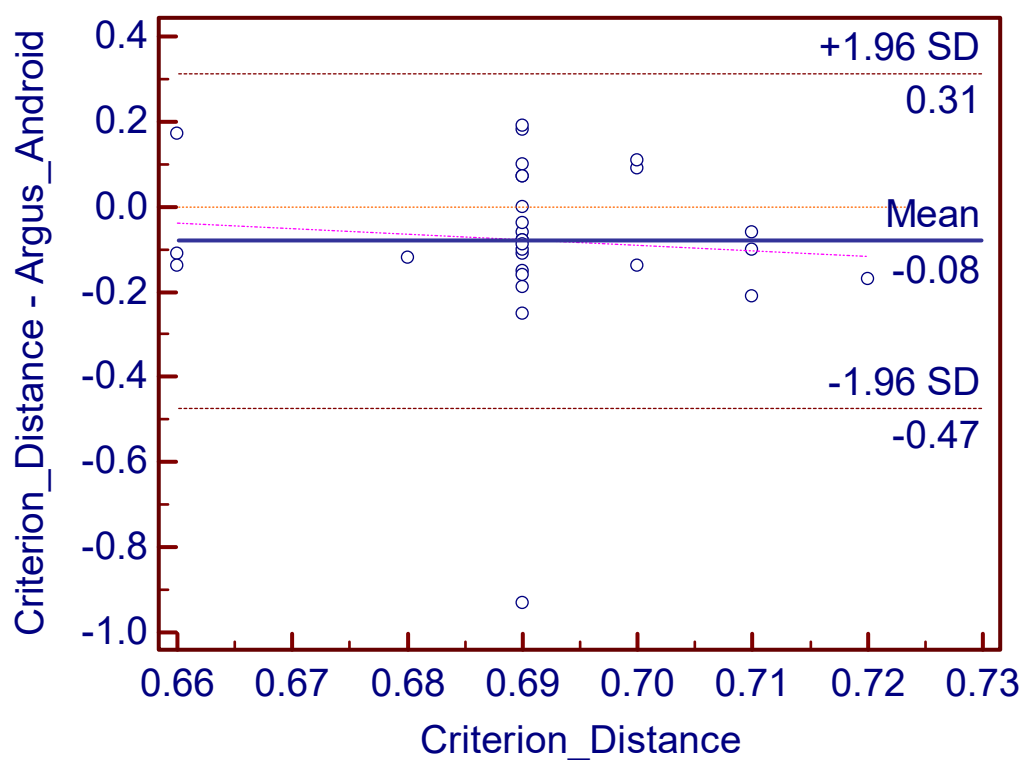

**Figure S48.** Bland-Altman plot for *Argus Android* distance estimates during walking at 8.4 km/h compared with criterion measure.
